1 **Short title:** Chloroplast-mitochondria cross-talk Cu limitation

2 **Author for Contact details:**

3 Dr. Anna A. Hippmann,  
4 University of British Columbia, Department of Earth Ocean and Atmospheric Science, Earth  
5 Sciences Building, 2207 Main Mall, Vancouver, V6T 1Z3, Canada  
6 [ahippman@eoas.ubc.ca](mailto:ahippman@eoas.ubc.ca)  
7

8 **Title:** Proteomic analysis of metabolic pathways shows chloroplast-mitochondria cross-talk in a  
9 Cu-limited diatom

10

11 **Authors and affiliations:**

12 Anna A. Hippmann<sup>1</sup>, Nina Schuback<sup>1</sup>, Kyung-Mee Moon<sup>2</sup>, John P. McCrow<sup>3</sup>, Andrew E.  
13 Allen<sup>3,4</sup>, Leonard F. Foster<sup>2</sup>, Beverley R. Green<sup>5</sup>, Maria T. Maldonado<sup>1</sup>

14

15 <sup>1</sup>University of British Columbia, Department of Earth Ocean and Atmospheric Science, Earth  
16 Sciences Building, 2207 Main Mall, Vancouver, V6T 1Z3, Canada

17 <sup>2</sup>Biochemistry and Molecular Biology, Michael Smith Laboratories, 2125 East Mall, Vancouver,  
18 BC V6T 1Z4, Canada

19 <sup>3</sup>J. Craig Venter Institute, San Diego, California 92121, USA

20 <sup>4</sup>Scripps Institution of Oceanography, University of California, San Diego, CA 92093

21 <sup>5</sup>University of British Columbia, Department of Botany, Room #3200 - 6270 University  
22 Boulevard, Vancouver, B.C., V6T 1Z4, Canada

23

24 **One sentence summary:** Diatoms adapt to Cu limitation by regulating their large repertoire of  
25 isoenzymes to channel electrons away from the chloroplast, enhance nitrogen uptake, and  
26 integrate the oxidative stress response.<sup>123</sup>

27

---

<sup>1</sup> AAH, AEA, LJF, BRG, and MTM planned and designed the research. AAH performed cell culturing, protein purification, statistical analysis, curated protein annotation, and targeting prediction. KMM performed protein purification and LC-MS/MS. JPM, under the guidance of AEA, created the RNAseq dataset and provided bioinformatic assistance to AAH. AAH, BRG, and MTM wrote the manuscript.

<sup>2</sup> This research was funded by NSERC with grants to MTM and LJF.

<sup>3</sup> [ahippman@eoas.ubc.ca](mailto:ahippman@eoas.ubc.ca)

## 28 **Abstract**

29 Diatoms are one of the most successful phytoplankton groups in our oceans, being responsible  
30 for over 20% of the Earth's photosynthetic productivity. Their chimeric genomes have genes  
31 derived from red algae, green algae, bacteria and heterotrophs, resulting in multiple isoenzymes  
32 targeted to different cellular compartments with the potential for differential regulation under  
33 nutrient limitation. The resulting interactions between metabolic pathways are not yet fully  
34 understood.

35 We previously showed how acclimation to Cu limitation enhanced susceptibility to  
36 overreduction of the photosynthetic electron transport chain and its reorganization to favor  
37 photoprotection over light-harvesting in the oceanic diatom *Thalassiosira oceanica* (Hippmann  
38 et al., 2017). In order to understand the overall metabolic changes that help alleviate the stress of  
39 Cu limitation, we generated comprehensive proteomic datasets from the diatom *Thalassiosira*  
40 *oceanica* grown under Cu-limiting and -replete conditions. The datasets were used to identify  
41 differentially expressed proteins involved in carbon, nitrogen and oxidative stress-related  
42 metabolic pathways and to predict the proteins cellular location.

43 Metabolic pathway analysis showed integrated responses to Cu limitation in diatoms. The up-  
44 regulation of ferredoxin (Fdx) was correlated with up-regulation of plastidial Fdx-dependent  
45 isoenzymes involved in nitrogen assimilation as well as enzymes involved in glutathione  
46 synthesis thus integrating nitrogen uptake and metabolism with photosynthesis and oxidative  
47 stress resistance. The differential regulation of glycolytic isoenzymes located in the chloroplast  
48 and mitochondria enables them to channel both excess electrons and/or ATP between these  
49 compartments. Additional evidence for chloroplast-mitochondrial cross-talk is shown by up-  
50 regulation of chloroplast and mitochondrial proteins involved in the proposed malate shunt.

51

## 52 **Introduction**

53 Diatoms form an integral part of our oceans, influencing nutrient cycling and productivity of  
54 many marine foodwebs (Armbrust, 2009). Annually, marine diatoms fix as much carbon dioxide  
55 through photosynthesis as all terrestrial rainforests combined (Field et al., 1998; Nelson et al.,  
56 1995), thus having a significant impact on atmospheric CO<sub>2</sub> levels and global climate. One key  
57 to their success may lie in their complex evolutionary history (Moustafa et al., 2009; Oborník  
58 and Green, 2005) which resulted in a mosaic genome with genes derived from the original

59 heterotrophic eukaryotic host cell, the engulfed green and red algal endosymbionts, and a variety  
60 of associated bacteria (Armbrust et al., 2004; Bowler et al., 2008; Finazzi et al., 2010). As a  
61 result, diatoms possess multiple isoenzymes in many metabolic pathways, especially in carbon  
62 metabolism (Ewe et al., 2018; Gruber et al., 2009; Gruber and Kroth, 2014; Kroth et al., 2008;  
63 Smith et al., 2012).

64 The presence of multiple isoenzymes with different evolutionary histories also led to  
65 novel locations and interactions among metabolic pathways compared to green algal and animal  
66 ancestors (Allen et al., 2011; Gruber and Kroth, 2017). For example, in animals the complete set  
67 of proteins involved in glycolysis is located in the cytosol, whereas in green algae the first half of  
68 glycolysis (glucose to glyceraldehyde-3-phosphate, GAP) is located in the chloroplast and the  
69 second half (GAP to pyruvate) in the cytosol. In diatoms, an almost complete set of glycolytic  
70 proteins is found in both the cytosol and the chloroplast, with an additional set of proteins from  
71 the second half of glycolysis located in the mitochondria (Kroth et al., 2008; Río Bártulos et al.,  
72 2018; Smith et al., 2012). Furthermore, proteins involved in the ancient Entner-Doudoroff  
73 pathway, which is predominantly restricted to prokaryotes and catabolizes glucose to pyruvate,  
74 have also been identified in diatom genomes and are targeted to the mitochondria (Fabris et al.,  
75 2012; Río Bártulos et al., 2018).

76 The genome of *Phaeodactylum tricornutum* (*P. tricornutum*) encodes five different  
77 fructose-bisphosphate aldolase (FBA) isoenzymes, three targeted to the chloroplast and two to  
78 the cytosol (Allen et al., 2012). Each FBA has its own phylogenetic history. The expression  
79 pattern of these five isoenzymes changes depending on the nutritional status of the cell (Allen et  
80 al., 2012).

81 One of the most surprising discoveries from diatom genome sequencing was a complete  
82 urea cycle (Allen et al., 2011; Armbrust et al., 2004). In contrast to the catabolic nature of the  
83 urea cycle in animals, in diatoms it is an integral part of cellular metabolism and a hub of  
84 nitrogen and carbon redistribution within the cell. It is involved in amino acid synthesis, cell wall  
85 formation, carbon and nitrogen recycling, and it interacts with the citric acid cycle (Allen et al.,  
86 2011; Armbrust et al., 2004).

87 Most molecular studies on acclimation to nutrient limitation have focused on  
88 macronutrients, or on the essential micronutrient Fe, which limits phytoplankton in over 30% of  
89 the ocean (Moore et al., 2004). Some studies have shown an intricate interaction between Fe and

90 Cu nutrition in phytoplankton (Annett et al., 2008; Guo et al., 2012; Maldonado et al., 2006,  
91 2002; Peers and Price, 2006), but there are only a handful of studies on physiological adaptations  
92 to Cu limitation alone (Guo et al., 2015, 2012; Kong and M. Price, 2020; Lelong et al., 2013;  
93 Lombardi and Maldonado, 2011; Maldonado et al., 2006; Peers et al., 2005; Peers and Price,  
94 2006).

95 Our recent comprehensive investigation on the physiological and proteomic changes to the  
96 photosynthetic apparatus of two strains of the open ocean diatom *Thalassiosira oceanica* (*T.*  
97 *oceanica*) in response to chronic Cu limitation revealed both similar and different strategies  
98 compared to those observed in response to low Fe (Hippmann et al., 2017). Acclimation to low  
99 Cu caused a bottleneck in the photosynthetic electron transport chain that was accompanied by  
100 major increases in the electron acceptors ferredoxin and ferredoxin:NADP<sup>+</sup> reductase, which  
101 have major roles in counteracting reactive oxygen species. Along with changes in the  
102 composition of the light-harvesting apparatus, this resulted in a shift from photochemistry to  
103 photoprotection.

104 To better understand how carbon and nitrogen metabolism are affected and may interact  
105 when Cu is limiting, we now expand our proteomics analysis to include proteins involved in  
106 various carbon and nitrogen metabolic pathways (e.g. Calvin-Benson-Bassham cycle, glycolysis,  
107 TCA cycle, nitrogen acquisition and assimilation, urea cycle, malate shunt, glutathione  
108 metabolism), taking into account their predicted cellular compartments.

109

## 110 **Results**

### 111 **Overview of proteomic datasets**

112 We investigated two strains, CCMP 1003 and CCMP 1005, of the centric diatom *T. oceanica*  
113 (here referred to as TO03 and TO05, respectively). Cu limitation had a stronger and more  
114 comprehensive effect on proteins of the carbon and nitrogen metabolism in TO03 than TO05, in  
115 line with observations for photosynthetic electron transport proteins (Hippmann et al., 2017).  
116 Although the proteomic dataset of TO05 contains twice as many distinct proteins as that of TO03  
117 (1,431 versus 724), TO03 has three times more significantly up-regulated and ten times more  
118 significantly down-regulated proteins (Fig. 1, overview Fig. S 5 and S 6). For this reason, if not  
119 noted otherwise, we will focus on the TO03 results only (Table 2, Table 3). A short discussion  
120 on the different adaptational strategies of the two strains can be found in Notes S 1. The data for

121 all relevant proteins in both strains, and both proteomic datasets (main and extended) are given in  
122 the Supplementary Table S 2 – S 9. Expression differences are classed as “highly regulated”  
123 (greater than or equal to 2-fold difference) or “regulated” (1.3 to 2-fold difference, see Methods).  
124 All differential expression data discussed in the text are significantly up- or down-regulated  
125 ( $p < 0.05$ ), unless otherwise noted.

126 Of the 724 distinctive proteins in TO03, 525 have associated Kegg Orthology (KO)  
127 identifiers, and 52% of these were related to metabolism (Fig. 2). Furthermore, 77-78% of these  
128 metabolic proteins were particularly affected by Cu limitation, with general trends of down-  
129 regulation of proteins involved in energy metabolism, up-regulation of those in carbohydrate  
130 metabolism, and a modification of those in amino acid metabolism.

131

### 132 **Carbon fixation, Glycolysis and the Citrate (TCA) cycle**

133 Diatom genomics have shown that enzymes of glycolysis are found in all three major  
134 compartments: chloroplast stroma, cytosol and mitochondria (Gruber and Kroth, 2017; Kroth et  
135 al., 2008; Río Bártulos et al., 2018; Smith et al., 2012). Four (or seven, if the 3 triose isomerase  
136 isoenzymes are counted) of the 15 proteins involved in the carbon fixing Calvin-Benson-  
137 Bassham (CBB) cycle are part of the chloroplast glycolytic pathway (Table 2, Fig. 3 (CBB and  
138 TCA cycle), Fig. 4 (Glycolysis), Table S 4). In the initial step of CO<sub>2</sub> fixation, the large and  
139 small subunits of Rubisco were not affected by Cu limitation but the essential Rubisco activator  
140 protein cbbX (To24360) was down-regulated by 2.3-fold. Six proteins were up-regulated:  
141 phosphoglycerate kinase (PGK, To07617) by 6.8-fold, the two fructose-bisphosphate aldolase,  
142 class II proteins by 1.4 and 2-fold (FBA II, To00388 and To12069), and the three triose  
143 phosphate isomerase isoenzymes (TPI, To02438, To35826, To32006) by 3.3-, 1.9- and 1.5-fold,  
144 respectively. Glyceraldehyde 3-phosphate dehydrogenase (GAPDH, To13085) and  
145 phosphoglycerate mutase (PGAM, To21902, 2.3-fold) were the only proteins down-regulated, by  
146 4.2- and 2.3-fold, respectively. Of the nine expressed proteins targeted to the chloroplast, only  
147 fructose-bisphosphate aldolase, class I (FBA I, To02112) was not affected by Cu limitation.

148 The up-regulation of TPI (Fig. 3, Fig. 4) combined with the down-regulation of GAPDH  
149 and PGAM could lead to an increase in triose-phosphates and their subsequent export from the  
150 chloroplast. Probing the genome for gene models containing the triose-phosphate transporter

151 Pfam domain identified seven candidate genes (Table S 3) of which only two were expressed.  
152 Neither of them was differentially expressed.

153 Nine expressed proteins involved in the citrate cycle in the mitochondria were identified  
154 (Fig. 3, Table 2, Table S 5). Malate dehydrogenase (MDH1, To03405) was the only one up-  
155 regulated (1.6-fold). Aconitase hydratase (ACO, To20545) and two isocitrate dehydrogenases  
156 (IDH, To37807, To34595) were all down-regulated by 4.7-, 3.0-, and 1.6-fold, respectively. Of  
157 the proteins considered to be part of mitochondrial glycolysis (Fig. 4), glyceraldehyde-3-  
158 phosphate dehydrogenase (GAPDH, To33331) and enolase (ENO, To34936) were both up-  
159 regulated by 3.8 and 1.5-fold respectively, while pyruvate kinase (PK, To07097) was down-  
160 regulated by 1.3-fold.

161 Of the eight expressed cytosolic proteins detected, three were down-regulated:  
162 phosphoglucomutase (PGM, To06412) by 3.2-fold, phosphofructokinase (PFK, To16559) by  
163 1.8-fold, and fructose-bisphosphate aldolase, class I (FBA I, To24978) by 1.6-fold (or 2.7-fold  
164 considering expression of a contig associated with the same gene). The only cytosolic protein  
165 that was up-regulated was pyruvate kinase (PK, To34937, by 1.6-fold).

166

### 167 **Nitrogen metabolism**

168 Twenty-two proteins involved in the urea cycle, nitrogen acquisition and assimilation, as well as  
169 four membrane transporters were identified (Table 3, Fig. 5, Table S 6). At the plasma  
170 membrane, the urea (URT, To31656) and nitrate/nitrite (NRT, To04919) transporters were both  
171 significantly up-regulated (6.9 and 11-fold, respectively). However, the expression of the two  
172 transporters putatively located in the chloroplast envelope, the formate/nitrate (NiRT, To00240)  
173 and ammonium (AMT, To07247) transporters were not affected by Cu limitation.

174 Within the chloroplast, three nitrite reductases were identified. Of these, the NAD(P)H-  
175 dependent isoenzyme was not differentially expressed (NAD(P)H-NiR, To35252), whereas two  
176 ferredoxin-containing nitrite reductases (Fe-NiR, To00016 and To02363) were up-regulated by  
177 1.3- and 2.3-fold, respectively, in concert with the increase of reduced ferredoxin in the  
178 chloroplast (Hippmann et al., 2017). Glutamine (GSII, To31900) and glutamate synthases  
179 (GOGAT, To13288) were both up-regulated (1.7- and 1.6-fold, respectively). In contrast,  
180 aspartate aminotransferase (AAT, To16827) was the only chloroplast protein involved in core  
181 nitrogen metabolism that was down-regulated (2.3-fold).

182 In the mitochondria, glutamine synthase (GSIII, To06032) was 5.3-fold down-regulated  
183 while glutamate synthase (GOGAT, TO04828) expression did not change. The mitochondrial  
184 aspartate aminotransferase (AAT, To15049) was up-regulated by 3.6-fold. Glycine  
185 decarboxylase t- and p-proteins (GDCT/P, To17688 and To36273), involved in photorespiration,  
186 were not affected. In the urea cycle, six proteins were identified but only ornithine  
187 carbamoyltransferase (OTC, To05385) was up-regulated by 1.7-fold.

188 In the cytosol, glutamate dehydrogenase (GDH, To06254) was up-regulated by 2.09-fold  
189 ( $p = 0.05$ ) and nitrate reductase (NR, To34460) was up-regulated by 1.5-fold. The only other  
190 cytosolic protein upregulated was spermidine synthase (SRM, To22108; by 2.3-fold), which is  
191 essential for silica deposition.

192

### 193 **Malate shunt**

194 In plants, malate transfers excess NAD(P)H reducing equivalents from one compartment (i.e. the  
195 chloroplast) to another (i.e. the mitochondria) (reviewed by (Scheibe, 2004)). Metabolite  
196 antiporters and two isoenzymes for malate dehydrogenase (MDH) and amino aspartate  
197 transaminase (AAT) are involved (Table 2, Fig. 6, Table S 8). In diatoms, the malate shunt has  
198 been proposed to connect the chloroplast with the mitochondria (Bailleul et al., 2015; Prihoda et  
199 al., 2012). In *P. tricornutum*, both MDH1 and MDH2 are targeted to the mitochondrion (Ewe et  
200 al., 2018) but in *T. pseudonana* MDH2 is predicted to be targeted to the chloroplast (Smith et al.,  
201 2012). Aligning the *T. oceanica* model with Smith's extended TpMDH2 model (Fig. S 2),  
202 supports the conclusion that ToMDH2 is also targeted to the chloroplast.

203 In our proteomic datasets, we found evidence for regulation of both isoenzyme sets in the  
204 putative malate shunt (MDH1, MDH2, AAT, AAT2), as well as two isoenzymes of pyruvate  
205 carboxylase (PC) that could be feeding into this metabolic pathway (Fig. 6). Of these 6 enzymes,  
206 4 were up-regulated: both, plastidial pyruvate carboxylase (PC, To31413) and malate  
207 dehydrogenase (MDH2, To30817) by 2.6- fold and mitochondrial MDH1 (To03405) and AAT2  
208 (To15049) by 1.6- and 3.6-fold, respectively. Only the plastidial AAT (To16827) was down-  
209 regulated (by 2.3-fold).

210

211

212

## 213 **Glutathione and antioxidant metabolism strongly upregulated**

214 Glutathione is a small tripeptide (Glu-Cys-Gly) that is involved in redox sensing and  
215 counteracting ROS. Twenty-one expressed proteins involved in glutathione metabolism and  
216 other antioxidant agents (eg. three thioredoxins, three glutaredoxins, and three superoxide  
217 dismutases) were identified (Table 3, Fig. 7, Table S 7). Nine proteins are predicted to be  
218 targeted to the chloroplast. Six of these were up-regulated: two isoenzymes for cysteine synthase  
219 (CYS, To27524 by 2.5-fold, To10442 by 1.5-fold), glutamate synthase (GOGAT, To13288 by  
220 1.6-fold), glutathione reductase (GR, To07268, by 2.5-fold), thioredoxin (TXN, To31425, by  
221 1.5-fold), and the Mn-containing SOD (MnSOD, To02860, by 1.8-fold). Two glutaredoxin  
222 isoenzymes (GRX; To07269, To18234) were only mildly down-regulated proteins (both by 1.3-  
223 fold).

224 Of the nine cytosolic proteins, glutathione-S-transferase (GST, To09062) and TXN  
225 (To05213) were highly up-regulated (by 7.3- and 4.2-fold, respectively), while one of the two  
226 Ni-dependent SOD isoenzymes was moderately up-regulated (NiSOD, To10112, by 1.4-fold).  
227 Glutamate-cysteine ligase (GCL/GCS, To23355) was only identified in one of the biological  
228 triplicates, but with a 4.5-fold increase in expression. In contrast to the chloroplast CYS  
229 isoenzymes, the expression of cytosolic CYS (To05931) did not change. The TO03 GST  
230 (To09062) has its closest homologs in the polyp *Hydravulgaris*, the anemone *Nematostella*, and  
231 the brachiopod *Lingula*, and not in other diatoms (Table S 7).

232 Only 2 of the expressed proteins involved in glutathione metabolism are predicted to be  
233 targeted to the mitochondria; TXN (To13864) was up-regulated by 1.8-fold, whereas  
234 glutaredoxin (GRX, To02323) was not differentially expressed in Cu-limited TO03.

235

## 236 **Discussion**

237 In response to low Cu, *T. oceanica* (CCMP1003) restructures the photosynthetic electron  
238 transport proteins, resulting in a decrease in carbon assimilation, and increased susceptibility to  
239 overreduction of the photosynthetic electron transport chain (Hippmann et al., 2017). Over-  
240 reduction of the photosynthetic electron transport chain at super-saturating light intensities can  
241 lead to an increase in reactive oxygen species (ROS). Consequently, there is an increased need to  
242 safely dissipate excess energy, for example through additional electron sinks (Niyogi, 2000). Our  
243 findings of a ~40-fold increase in ferredoxin (Fd, petF) and a 2.5-fold increase in ferredoxin :



244 NAD(P)H oxidoreductase (FNR) under Cu limitation (Hippmann et al. 2017) imply that there is  
245 indeed a surplus of reduced ferredoxin (Fd<sup>red</sup>) and NAD(P)H in the chloroplast. Here, we  
246 describe how the interaction between various metabolic pathways (e.g. nitrogen assimilation,  
247 glycolysis, citrate and the urea cycle) and the sophisticated coordination between the chloroplast  
248 and the mitochondria facilitate the re-oxidation of Fd<sup>red</sup> and NAD(P)H in the chloroplast.

249

250 **Carbon metabolism – the Calvin-Benson-Bassham cycle is down-regulated via its activase,**  
251 **and glycolysis is used to redistribute ATP and NAD(P)H within the cell**

252 The three most thoroughly annotated diatom genomes [*T. pseudonana*, Armbrust et al,  
253 2004; *P. tricornutum*, Bowler et al, 2008; *F. cylindricus*, Mock et al, 2017] revealed many  
254 isoenzymes, particularly those involved in C metabolism. Indeed, homologous C metabolism  
255 isoenzymes exist among and between these diatoms (Gruber and Kroth, 2017; Kroth et al., 2008;  
256 Smith et al., 2012), and their differential expression is thought to manage cellular carbon flow.  
257 Furthermore, given that within the chloroplast more than 50% of the proteins involved in  
258 glycolysis are also part of the Calvin-Benson-Bassham cycle (Smith et al., 2012), to regulate C  
259 flow, some isoenzymes might be preferentially involved in glycolysis over carbon fixation. For  
260 example, in *P. tricornutum*, the three plastidial fructose-bisphosphate aldolases (FBAs) are  
261 differently targeted and regulated under low vs. high Fe conditions (Allen et al., 2012), (Table 4).  
262 Here, we hypothesize that to overcome Cu limitation, *T. oceanica* down-regulates the Calvin-  
263 Benson-Bassham cycle, while modulating glycolysis to promote the redistribution of ATP and  
264 NAD(P)H reducing equivalents among cellular compartments.

265 Similarly to *P. tricornutum*, Cu-limited *T. oceanica* also regulates the expression of FBA  
266 homologs, albeit differently than Fe-limited (Table 4): while the chloroplast FBA (FbaC2  
267 homolog, To12069) is up-regulated, one of the pyrenoid-associated FBAs is only mildly up-  
268 regulated (FbaC1 homolog, To00388). We propose that FbaC2 is preferentially involved in  
269 glycolysis over C assimilation. This is supported by: (1) C assimilation decreased by 66% in Cu-  
270 limited cultures compared to the control (Hippmann et al, 2017), suggesting it is less likely for  
271 the C fixation proteins to be up-regulated; (2) the three significantly up-regulated proteins  
272 involved in the Calvin-Benson-Bassham cycle can also be part of glycolysis (i.e. PGK, TPI, and  
273 FBA, Table 2); (3) none of the distinct Calvin-Benson-Bassham cycle proteins (i.e. Rubisco,  
274 RPI, and RPE) were differentially expressed; (4) the red algal-type Rubisco activase (cbbX) was

275 down-regulated by 2.25-fold. The down-regulation of *cbbX* results in slower carbon fixation and  
276 activity of Rubisco proteins—though Rubisco levels remain unchanged (Mueller-Cajar et al.,  
277 2011). Since RPI and RPE abundance remain constant, ribulose-bisphosphate would be bound to  
278 Rubisco. Consequently, once nutrient conditions are favorable, only the *cbbX* would need up-  
279 regulation for C fixation to proceed. We suggest that this strategy might be advantageous in  
280 nutrient limited environments with short-lived nutrient-rich conditions.

281 In general, most reactions facilitated by proteins in glycolysis can proceed in either  
282 direction, i.e. glycolysis or gluconeogenesis. Smith *et al.* (2012) suggest that gluconeogenesis  
283 prevails in the mitochondria. However, assuming that the required metabolite transporters are  
284 present in the mitochondria (e.g. aspartate/glutamate shuttle, malate/2-oxoglutarate shuttle,  
285 citrate/malate shuttle, and fumarate/succinate shuttle), modelling flux balances in *P. tricornutum*  
286 predict that glycolysis would indeed be more favorable than gluconeogenesis in the mitochondria  
287 (Kim et al., 2016).

288 In *T. oceanica*, in each cellular compartment, different subsets of glycolytic proteins were  
289 up- or down-regulated under Cu limitation (Fig. 4, Table S 4, overview Fig. S 5). Focusing on  
290 the up-regulated proteins (Fig. S 3), a pattern emerges suggesting ATP formation in the  
291 chloroplast and cytosol, as well as NAD(P)H consumption in the chloroplast and its coupled  
292 formation in the mitochondria. By reducing chloroplast GAPDH (To13085) and increasing  
293 mitochondrial GAPDH (To33331), NAD(P)H reducing equivalents would be generated in the  
294 mitochondria, whereas increasing PGK (To07617) in the chloroplast would increase ATP in this  
295 compartment. Therefore, a decreased ATP/NAD(P)H ratio in the plastid would be predicted  
296 under Cu limitation.

297 Interestingly, Hockin et al (2012) postulated that *T. pseudonana* increases glycolytic  
298 activity when nitrogen starved. However, when we mapped the involved proteins in *T.*  
299 *pseudonana* to their cellular target compartments, a regulation of isoenzymes similar to the  
300 response of Cu-limited *T. oceanica* emerges (i.e. PK down-regulated in mitochondria and up-  
301 regulated in the cytosol, Fig. S 3, Table S 4). Thus, the coordinated regulation of particular  
302 glycolytic isoenzymes to distribute NAD(P)H reducing equivalents and/or ATP production might  
303 be a general trait in diatoms.

304

305

306 **Nitrogen metabolism is essential for Fd<sup>red</sup> oxidation and glutamate synthesis to fight ROS**

307 Another striking feature in the response to Cu limitation in *T. oceanica* was the up-regulation of  
308 nitrogen acquisition and assimilation (Fig. 5, Table S 6, overview Fig. S 5). In plants, nitrogen  
309 assimilation is an important sink for excess NAD(P)H (Hoefnagel et al., 1998). In *T. oceanica*,  
310 the up-regulation of nitrate assimilation may alleviate the stress incurred by low Cu, namely by  
311 re-oxidizing Fd<sup>red</sup> in the chloroplast. This is achieved via up-regulation of only those NiR  
312 isoenzymes that use Fd<sup>red</sup> as their cofactor (To00016, To02363). Glutamine synthase (GSII,  
313 To31900) and the Fd<sup>red</sup>-dependent glutamate synthase (GOGAT, To13288) were also up-  
314 regulated, thereby easing the chloroplast electron pressure. The importance of this strategy for  
315 Cu-limited cells is strengthened by the fact that both the membrane-bound urea (To31656) and  
316 nitrate (To04919) transporters are among the 15 highest up-regulated proteins in our dataset,  
317 while its carbon:nitrogen content ratio remains unaffected (Kim and Price, 2017).

318

319 **Counteracting reactive oxygen species – glutathione, thioredoxin, and superoxide**  
320 **dismutases**

321 An enhanced nitrogen assimilation increases glutamate, which can be incorporated into (or be a  
322 precursor of) glutathione (GSH,  $\gamma$ -L-glutamyl-L-cysteine-glycine) to detoxify ROS via either  
323 direct scavenging or the ascorbate-glutathione cycle (Foyer and Noctor, 2011). Glutathione  
324 biosynthesis involves: (1) the cytosolic glutamate cysteine ligase (GCL, also known as  $\gamma$ -  
325 glutamylcysteine synthase, GCS) which combines glutamate and cysteine to  $\gamma$ -glutamyl-L-  
326 cysteine and (2) the plastid glutathione synthase (GSS) which adds glycine. Strikingly, both  
327 proteins were up-regulated in Cu-limited *T. oceanica*. However, in plants, the rate-limiting step  
328 in glutathione production is cysteine biosynthesis (Zechmann, 2014). Under Cu limitation, two  
329 chloroplast cysteine synthase isoenzymes were up-regulated (CS, To27524 and To10442; Fig. 7,  
330 Table 3, Table S 7) indicating an increase in glutathione production. Furthermore, glutathione-S-  
331 transferase was one of the most highly up-regulated proteins (GST, To09062), which is able to  
332 add glutathione to nucleophilic groups to detoxify oxidative stress (Gallogly and Mieyal, 2007).  
333 The up-regulation of glutathione reductase (GR, To07268), which oxidizes the over-abundant  
334 NAD(P)H in the chloroplast further supports that in *T. oceanica* glutathione counteracts ROS.

335 Thioredoxins (TXN) are important redox regulators in plants, especially in the  
336 chloroplast (Balmer et al., 2003), although their role in diatoms is unclear (Weber et al., 2009).

337 In *T. oceanica*, three thioredoxins were up-regulated, and each one was targeted to either the  
338 chloroplast (TXN, To31425), the cytosol (To05213), or the mitochondria (To31425).

339 Another defence mechanism against ROS is the production of superoxide dismutases  
340 (SOD), which catalyze the conversion of superoxide radicals into hydrogen peroxide and  
341 oxygen. Of the three SODs identified in Cu-limited cultures, two were up-regulated: chloroplast  
342 Mn/Fe-SOD (To02860) and cytosolic Ni-SOD (To10112). Thus, under Cu limitation, cells are  
343 able to control ROS levels by increasing the expression of both glutathione and SODs. The  
344 increase of thioredoxin isoenzymes in all three major cellular compartments (i.e. cytosol,  
345 chloroplast, mitochondria) points to their involvement in sensing the cellular redox state and  
346 regulating excess NAD(P)H.

347

### 348 **The malate shunt drains NAD(P)H reducing equivalents from the chloroplast to the** 349 **mitochondria, thus integrating the nitrogen and carbon metabolisms**

350 The efficiency of photosynthesis (both electron transport and carbon fixation) depends on an  
351 adequate supply of ATP/ADP and NAD(P)H/NAD(P)<sup>+</sup> (Allen, 2002). In plants, the malate shunt  
352 can channel excess NAD(P)H reducing equivalents from the chloroplast to other cellular  
353 compartments, via the differential regulation of malate dehydrogenase (MDH) isoenzymes  
354 (Heineke et al., 1991; Scheibe, 2004). In this process, NAD(P)H in the chloroplast reduces  
355 oxaloacetate to malate, a compound that can be transported across membranes and re-oxidized,  
356 resulting in the production of NAD(P)H in the target compartment. NAD(P)H can then be used  
357 in reactions such as nitrate reduction in the cytosol or ATP production in the mitochondria.

358 In diatoms, the interaction between the chloroplast and mitochondria is expected to be  
359 multifaceted, possibly with direct exchange of ATP/ADP (Bailleul et al., 2015) and indirect  
360 exchange of NAD(P)H via the ornithine/glutamate shunt (Broddrick et al., 2019; Levering et al.,  
361 2016) and the malate/aspartate shunt (Bailleul et al., 2015; Prihoda et al., 2012). Some support  
362 for the spatial interconnectedness between chloroplast and mitochondria in diatoms has been  
363 found recently (Flori et al., 2017). However, the location of the potential transporters needed  
364 (e.g. malate/2-oxoglutarate antiporter, glutamate/aspartate antiporter) have yet to be proven  
365 (Bailleul et al., 2015; Kim et al., 2016; Kroth et al., 2008).

366 We present here compelling evidence for an activated malate/aspartate shunt in *T.*  
367 *oceanica* in response to low Cu. We observe the up-regulation of chloroplast and mitochondrial

368 MDH (MDH2, To30817; MDH1, To03405), as well as mitochondrial aspartate aminotransferase  
369 (AAT2, To15049, Fig. 6). Chloroplast oxaloacetate (OAA) is reduced to malate via MDH2.  
370 Malate is then transported into the mitochondria via a putative malate/2-oxoglutarate antiporter  
371 (Kim et al., 2016). NAD(P)H reducing equivalents are released in the mitochondria via the re-  
372 oxidation of malate to OAA by mitochondrial MDH1. In turn, mitochondrial AAT2 transfers an  
373 amine group from glutamate to OAA, thereby releasing aspartate and 2-oxoglutarate into the  
374 mitochondria. To close the cycle, aspartate is transported back, via a glutamate/aspartate  
375 antiporter, into the chloroplast where the plastidial AAT isoenzyme would resupply OAA.  
376 However, chloroplast AAT was significantly down-regulated. We suggest that chloroplast OAA,  
377 the substrate for MDH2, is resupplied in the chloroplast via the ATP-dependent carboxylation of  
378 pyruvate due to the significant up-regulation of pyruvate carboxylase (PC). This leads to a net  
379 decrease of NAD(P)H in the chloroplast and a net increase of NAD(P)H in the mitochondria.  
380 Furthermore, the channeling of NAD(P)H reducing equivalents towards respiration, instead of  
381 the Calvin-Benson-Bassham cycle, is supported by a 66% decreased in C fixation, while  
382 respiration rates remained constant (Hippmann et al, 2017).

383 The increase in 2-oxoglutarate and aspartate in the mitochondria, due to an up-regulation  
384 of mitochondrial AAT2, can be helpful for the cell. If the putative malate/2-oxoglutarate  
385 antiporter is indeed involved in the malate shunt, 2-oxoglutarate will be transported back into the  
386 chloroplast. As chloroplast AAT is down-regulated, 2-oxoglutarate can be used as a substrate for  
387 the up-regulated Fd-dependent glutamate synthase (GOGAT) in nitrogen assimilation. Any  
388 surplus 2-oxoglutarate in the mitochondria can feed into the citrate cycle. Fittingly, aconitase  
389 (To20545) and isocitrate dehydrogenase (To34595), the two proteins involved in the citrate cycle  
390 immediately before 2-oxoglutarate, were both significantly down-regulated (Fig. 3).

391 Mitochondrial aspartate can be channelled into the urea cycle, where it will produce  
392 argininosuccinate, which can then be diverted back into the mitochondrial citrate cycle as  
393 fumarate via the aspartate/fumarate shunt (Allen et al., 2011). Thus, even though two of the first  
394 three steps in the citrate cycle were down-regulated, the malate shunt in combination with the  
395 urea cycle would ensure the continuation of this vital metabolic pathway by supplying it with  
396 essential carbon skeletons, i.e. 2-oxoglutarate and fumarate.

397 In addition to the malate shunt, other pathways have been proposed to alleviate electron  
398 pressure in diatoms. In *P. tricornutum*, modelling experiments suggest the prevalence of the

399 glutamine-ornithine shunt over the malate shunt (Broddrick et al., 2019). However, none of the  
400 homologs involved in this shunt were identified in Cu-limited *T. oceanica* (e.g. n-acetyl- $\gamma$ -  
401 glutamyl-phosphate reductase; n-acetylornithine aminotransferase). Furthermore, the activation  
402 of alternative oxidase (AOX) in Fe-limited *P. tricornutum* to alleviate electron stress in the  
403 impaired mitochondrial respiration (Allen et al., 2008) was not observed in Cu-limited *T.*  
404 *oceanica* (Hippmann et al., 2017). Future research is needed to elucidate the regulation of shuttle  
405 system/compartamental cross talks in diatoms.

406

## 407 **Conclusion**

408 The success of diatoms in the modern ocean is thought to be due to their complex genomic  
409 makeup, and their successful integration and versatility of metabolic pathways. This was  
410 exemplified in the present study, where we show how interaction among metabolic pathways act  
411 to maximize growth in *T. oceanica* (CCMP 1003) acclimated to severe Cu-limiting conditions.  
412 Our data show increased metabolic cross-talk between (1) Photosynthesis – N metabolism (0  
413 Nitrogen metabolism, Fig. 5): the overreduced state of the photosynthetic apparatus results in an  
414 increase in Fd<sup>red</sup>, which was then oxidized by an N-assimilatory, Fd<sup>red</sup>-dependent isoenzyme  
415 located in the chloroplast; (2) Nitrogen metabolism and ROS fighting (Glutathione and ROS,  
416 Fig. 7): the increase in glutamate and cysteine synthase, as well as other key proteins in the  
417 glutathione metabolism, ensures the ability to counteract ROS; (3) Photosynthesis and Malate  
418 Shunt (Malate Shunt, Fig. 6): excess NAD(P)H reducing equivalents generated by the  
419 photosynthetic apparatus are channeled from the chloroplast to the mitochondria via the malate  
420 shunt. (4) Photosynthesis – glycolysis – carbon fixation (Carbon Metabolism, Fig. 3): to  
421 counteract the imbalance between ATP/NAD(P)H in the chloroplast, specific reactions in  
422 glycolysis occur in different compartments, where NAD(P)H reducing equivalents or ATP are  
423 needed (i.e. NAD(P)H generation in mitochondria, ATP production in cytosol and chloroplast).  
424 (5) Malate shunt – urea cycle– citrate cycle – glycolysis (Malate Shunt, Nitrogen Metabolism,  
425 Carbon Metabolism): the products of the malate shunt can feed into the TCA cycle and the urea  
426 cycle—the master cellular C and N redistribution hub. Furthermore, pyruvate can be  
427 carboxylated in the chloroplast to feed into the malate shunt, again transferring both NAD(P)H  
428 reducing equivalents and carbon skeletons from the chloroplast to the mitochondria. The up-  
429 regulation of N assimilation in response to chronic low Cu in TO03 contrasts the response of

430 TO03 to acute Fe limitation, as well as the response of *P. tricornutum* to N limitation. Whether  
431 this is due to differences in species, nutrients or level of stress remains an intriguing question.

432

## 433 **Methods**

### 434 **Cell Culturing**

435 Strains CCMP 1003 and CCMP 1005 of the centric diatom *T. oceanica* (here referred to as TO03  
436 and TO05, respectively) were obtained from the Provasoli-Guillard Center for Culture of Marine  
437 Phytoplankton, now National Centre for Marine Algae and Biota (NCMA) at Bigelow  
438 Laboratory for Ocean Sciences. Their identity as the same species was confirmed by ITS  
439 sequencing (Hippmann et al., 2017). For both strains, triplicate 10 L cultures of Cu-replete and  
440 Cu-limited strains were grown and harvested as detailed in Hippmann *et al.* (2017), with samples  
441 taken for a variety of physiological parameters and for differential proteomic analysis, as  
442 described also therein.

443 Note that in our study, the cells were acclimated to low Cu concentrations for many  
444 generations. Hence, the acclimation strategies in their physiology and proteome are not sudden,  
445 short-lived stress responses, but rather another ‘normal’ state for the cell to sustain growth under  
446 low Cu conditions.

447

### 448 **Protein purification and preparation for mass spectrometry**

449 Cells from the triplicate cultures were harvested by filtration, concentrated by centrifugation,  
450 flash-frozen with liquid N<sub>2</sub> and stored at -80°C until final processing. Protein extraction and  
451 preparation for differential proteomic analysis by mass spectrometry have been described in  
452 Hippmann et al. (2017).

453

### 454 **Liquid chromatography-tandem mass spectrometry – LC-MS/MS**

455 For TO03, purified peptides were analyzed on the linear-trapping quadrupole-Orbitrap mass  
456 spectrometer (LTQ-Orbitrap Velos; ThermoFisher Scientific) on-line coupled to an Agilent 1290  
457 Series HPLC using a nanospray ionization source (ThermoFisher Scientific) including a 2 cm  
458 long, 100 µm-inner diameter fused silica trap column, 50 µm-inner diameter fused silica fritted  
459 analytical column and a 20 µm-inner diameter fused silica gold coated spray tip (6 µm-diameter  
460 opening, pulled on a P-2000 laser puller from Sutter Instruments, coated on Leica EM SCD005

461 Super Cool Sputtering Device). The trap column was packed with 5  $\mu\text{m}$ -diameter Aqua C-18  
462 beads (Phenomenex, [www.phenomenex.com](http://www.phenomenex.com)), while the analytical column was packed with 3  
463  $\mu\text{m}$ -diameter Repronil-Pur C-18-AQ beads (Dr Maisch, [www.Dr-Maisch.com](http://www.Dr-Maisch.com)). Buffer A  
464 consisted of 0.5% aqueous acetic acid, and buffer B consisted of 0.5% acetic acid and 80%  
465 acetonitrile in water. The sample was loaded onto the trap column at 5  $\mu\text{L min}^{-1}$  and the analysis  
466 was performed at 0.1  $\mu\text{L min}^{-1}$ . Samples were eluted with a gradient method where buffer B was  
467 from 10% to 25% over 120 min, from 25% to 60% over 20 min, from 60% to 100% B over 7  
468 min, kept at 100% for 2.5 min and then the column was reconditioned for 20 min with buffer A.  
469 The HPLC system included Agilent 1290 series Pump and Autosampler with Thermostat set at  
470 6°C. The LTQ-Orbitrap was set to acquire a full-range scan at 60,000 resolution from 350 to  
471 1600 Th in the Orbitrap to simultaneously fragment the top fifteen peptide ions by CID in each  
472 cycle in the LTQ (minimum intensity 200 counts). Parent ions were then excluded from MS/MS  
473 for the next 30 sec. Singly charged ions were excluded since in ESI mode peptides usually carry  
474 multiple charges. The Orbitrap was continuously recalibrated using the lock-mass function. The  
475 mass error measurement was typically within 5 ppm and was not allowed to exceed 10 ppm.

476 TO05's purified peptides were analyzed using a quadrupole – time of flight mass  
477 spectrometer (Impact II; Bruker Daltonics) on-line coupled to an Easy nano LC 1000 HPLC  
478 (ThermoFisher Scientific) using a Captive nanospray ionization source (Bruker Daltonics)  
479 including a column setup identical to that for TO03. Buffer A consisted of 0.1% aqueous formic  
480 acid, and buffer B consisted of 0.1% formic acid and 80% acetonitrile in water. Samples were  
481 run on a gradient method where buffer B was from 5% to 20% over 45 min, from 20% to 40%  
482 over 45 min then to 100% over 2 min, held at 100% for 15 min. Re-equilibration back to 5%  
483 buffer B was done separately by the LC automatically. The LC thermostat temperature was set at  
484 7°C. The sample was loaded onto the trap column at 800 Bar and the analysis was performed at  
485 0.25  $\mu\text{L min}^{-1}$ . The Impact II was set to acquire in a data-dependent auto-MS/MS mode  
486 fragmenting the 17 most abundant ions (one at the time) after each full-range scan from m/z 200  
487 Th to m/z 2000 Th. The isolation window for MS/MS was 2 to 3 Th depending on parent ion  
488 mass to charge ratio. Parent ions were then excluded from MS/MS for the next 0.4 min. Singly  
489 charged ions were excluded since in ESI mode peptides usually carry multiple charges. The error  
490 of mass measurement was typically within 5 ppm and was not allowed to exceed 10 ppm.

491



## 492 **Analysis of mass spectrometry data**

493 Analysis of mass spectrometry data was performed using MaxQuant 1.5.1.0. The first search  
494 (herein “main dataset”) was performed against a database composed of the protein sequences  
495 from the sequenced genome of strain CCMP 1005 (publicly available) plus common  
496 contaminants using the default MaxQuant parameters with match between run and re-  
497 quantification options turned on. Only those peptides exceeding the individually calculated 99%  
498 confidence limit (as opposed to the average limit for the whole experiment) were considered as  
499 accurately identified. A second extended search was performed (herein “extended dataset”) with  
500 identical search parameters but against a larger database that combined protein sequences from  
501 both the TO05 genome and predicted proteins from the assembled EST contigs of the TO03  
502 transcriptome (Hippmann et al., 2017). For reasons of clarity, if not noted otherwise, only  
503 differential expression data from the main dataset is discussed, as both datasets were in good  
504 agreement. Differential expression data from both the main and the extended dataset are  
505 presented in the supplementary Table S 2-S 9. The mass spectrometry proteomics data have been  
506 deposited to the ProteomeXchange Consortium via the PRIDE (Vizcaíno et al., 2016) partner  
507 repository with the dataset identifier PXD006237.

508

## 509 **Statistical analysis of differential protein expression**

510 As described above, peptides were labelled with different isotopologues of formaldehyde  
511 depending on their nutrient regime (i.e. control, lowCu, lowFeCu), then mixed in a 1:1:1 ratio  
512 and analyzed by LC-MS/MS. Differential expression is then derived from the ratio of the  
513 intensities (area under the curve) of the light and heavy peaks for each peptide (see schematic in  
514 Fig. S 1). All three nutrient regimes (control, lowCu, lowFeCu) were processed together to be as  
515 consistent as possible and to decrease the number of false positives. However, in the present  
516 study we discuss the lowCu data only.

517 We defined two levels of statistically significant difference in expression: 1) greater than  
518 or equal to 2-fold (highly regulated), or 2) between 1.3- and 2-fold (regulated). In addition, the  
519 result must be found in at least two of the three biological replicates and result in a *p*-value of  
520 <0.05 for the *z* test, determining significant difference of the average ratios between treatments,  
521 taking the variance into account. Additionally, any protein that had a differential expression ratio

522 of >10 (up-regulated) or <0.1 (down-regulated) in at least one biological replicate was  
523 considered to be an all-or-nothing response and was included in the ‘significantly changed’ set.

524

### 525 **Protein annotation and targeting prediction**

526 Predicted proteins from both the publicly available genome of TO05 (CCMP1005) and our  
527 transcriptome of TO03 (CCMP 1003) were searched against a comprehensive protein database,  
528 phyloDB for functional annotation using BlastP. PhyloDB version 1.076 consists of 24,509,327  
529 peptides from 19,962 viral, 230 archaeal, 4,910 bacterial, and 894 eukaryotic taxa. It includes  
530 peptides from the 410 taxa of the Marine Microbial Eukaryotic Transcriptome Sequencing  
531 Project (<http://marinemicroeukaryotes.org/>), as well as peptides from KEGG, GenBank, JGI,  
532 ENSEMBL, CAMERA, and various other repositories. To predict gene localization for proteins  
533 involved in carbon and nitrogen metabolism, four *in silico* strategies were followed: 1) sequences  
534 of candidate genes were compared to the publicly available chloroplast genomes of *T. oceanica*  
535 (CCMP 1005) (Lommer et al., 2010) and *T. pseudonana* (Armbrust et al., 2004; Oudot-Le Secq  
536 et al., 2007), 2) the diatom-specific chloroplast targeting sequence software ASAFind (Gruber et  
537 al., 2015) was used in conjunction with SignalP 3.0 (Petersen et al., 2011) to find nuclear  
538 encoded, chloroplast targeted proteins, 3) SignalP and TargetP (Emanuelsson et al., 2007) were  
539 used for mitochondrial targeting, and 4) comparison with curated subcellular locations of the  
540 closest homologs in *T. pseudonana*, *P. tricornutum*, and *Fragilariopsis cylindricus* genomes. We  
541 acknowledge that deducing cellular targeting via comparison to predicted or experimentally  
542 verified proteins in other diatoms can be challenging, as homologs can be found in different  
543 compartments depending on species (Gruber et al., 2015; Gruber and Kroth, 2017; Schober et al.,  
544 2019). The corresponding names of all protein abbreviations used throughout the present study  
545 (text and figures) are given in Table 1.

546

### 547 **Acknowledgements**

548 We wish to thank Angele Arrieta and Michael Murphy (Department of Microbiology and  
549 Immunology, UBC) for critical reading of the manuscript and NSERC for funding this research  
550 (Maria T Maldonado and Leonard J Foster).

551

552

553 **Supplemental Tables and Figures**

554

555 Table S 1: Comparison of cellular localization of various carbon metabolic pathways. (modified from (Gruber and  
556 Kroth, 2017).

557

558 Table S 2: Differential expression and predicted cellular location of proteins involved in the Calvin-Benson-  
559 Bassham cycle in TO03 and TO05 cultured in low Cu conditions *vs.* control.

560

561 Table S 3: Proteins with triose-phosphate transporter PFAM and their expression in TO03 and TO05 in response to  
562 Cu limitation *vs.* control

563

564 Table S 4: Differential expression and predicted cellular location of proteins involved in glycolysis in TO03 and  
565 TO05 cultured in low Cu conditions *vs.* control

566

567 Table S 5: Differential expression and predicted cellular location of proteins involved in the tricarboxylic acid  
568 (TCA) / citrate cycle in TO03 and TO05 cultured in low Cu conditions *vs.* control. (for diagram, see Fig. 3)

569

570 Table S 6: Differential expression and predicted cellular location of proteins involved in nitrogen metabolism  
571 including the urea cycle in TO03 and TO05 cultured in low Cu conditions *vs.* control.

572

573 Table S 7: Differential expression and predicted cellular location of proteins involved in glutathione metabolism in  
574 TO03 and TO05 cultured in low Cu conditions *vs.* control.

575

576 Table S 8: Differential expression and predicted cellular location of proteins involved in the putative malate shunt in  
577 TO03 and TO05 cultured in low Cu conditions *vs.* control

578

579 Table S 9: Differential expression and predicted cellular location of proteins involved in respiration in TO03 and  
580 TO05 cultured in low Cu conditions *vs.* control.

581

582 **Fig. S 1: Overview of Proteomic Method. A) Workflow, B) Table of preparation and mixing of samples**  
583 analyzed by LC-MS/MS.

584

585 **Fig. S 2: Clustal alignment of predicted amino acid sequences of TpMDH2 [Tp25953, original (TpMDH2\_old)**  
586 **and EST extended (TpMDH2\_new, Smith et al., 2012)] and ToMDH2 (To30817).** The new predicted cleavage  
587 sequence in TpMDH2\_new is underlined.

588

589 **Fig. S 3: Comparison of differential expression of proteins involved in glycolysis under chronic Cu limitation**  
590 **and acute N limitation.**: A) *T. oceanica* (CCMP1003) under chronic Cu limitation (present study); B) *T. oceanica*  
591 (CCMP 1005) under chronic Cu limitation (present study, supplementary tables); C) *T. pseudonana* under acute N  
592 limitation (Hockin et al., 2012).

593

594 **Fig. S 4: Differential expression of proteins involved in pyruvate metabolism.**

595

596 **Fig. S 5: An overview of the proteomic response in the nitrogen and carbon metabolisms in *T. oceanica***  
597 **(CCMP 1003) grown under Cu-limiting conditions.**

598

599 **Fig. S 6: An overview of the proteomic response in the nitrogen and carbon metabolisms in *T. oceanica***  
600 **(CCMP 1005) grown under Cu-limiting conditions.**

601

602 **Notes S 1: Discussion on the contrasting adaptations to Cu limitation in the two strains of *T. oceanica***

603 **(CCMP1003 and CCMP1005).**

604 **Tables**

605 Table 1: Abbreviations of proteins discussed in this paper.

| <b>Abbreviation</b> | <b>Name</b>                              | <b>Abbreviation</b> | <b>Name</b>                                                              |
|---------------------|------------------------------------------|---------------------|--------------------------------------------------------------------------|
| AAT                 | aspartate aminotransferase               | GST                 | glutathione-S-transferase                                                |
| ACAS                | acetyl-CoA Synthase                      | IDH                 | isocitrate dehydrogenase                                                 |
| ACC                 | acetyl-CoA carboxylase                   | LDH                 | L-lactate dehydrogenase                                                  |
| ACO                 | aconitasehydratase                       | MDH                 | malate dehydrogenase                                                     |
| Agm                 | agmatinase                               | ME                  | malic enzyme                                                             |
| AMT                 | ammonium transporter                     | NAD(P)H-NiR         | nitrite reductase (NAD(P)H-dependent)                                    |
| APX                 | ascorbate peroxidase                     | NR                  | nitrate reductase                                                        |
| Arg                 | arginase                                 | NRT                 | nitrate/nitrite transporter                                              |
| argD                | n-acetylornithine aminotransferase       | OCD                 | ornithine cyclodeaminase                                                 |
| AsL                 | argininosuccinatelyase                   | OdC                 | ornithine decarboxylase                                                  |
| AsuS                | argininosuccinate synthase               | OGD                 | 2-oxoglutarate dehydrogenase                                             |
| ATCase              | aspartate carbamoyltransferase           | OTC                 | ornithine carbamoyltransferase                                           |
| cbbX                | rubisco expression protein               | PC                  | pyruvate carboxylase                                                     |
| CS                  | citrate synthase                         | PDH                 | pyruvate dehydrogenase                                                   |
| CYS                 | cysteine synthase                        | PDH-E1              | pyruvate dehydrogenase-E1 component                                      |
| CYS2                | cysteine synthase                        | PDH-E2              | pyruvate dehydrogenase-E2 component (dihydrolipoamide acetyltransferase) |
| DHAR                | dehydroascorbate reductase               | PEPC                | phosphoenolpyruvate carboxylase                                          |
| DLDH                | dihydrolipoamide dehydrogenase           | PEPCK               | phosphoenolpyruvate carboxykinase                                        |
| EDA                 | 2-keto-3-deoxy phosphogluconate aldolase | PEPS                | phosphoenolpyruvate synthase                                             |
| EDD                 | 6-phosphogluconate dehydratase           | PFK                 | phosphofructokinase                                                      |
| ENO                 | enolase                                  | PGAM                | phosphoglycerate mutase                                                  |
| F2BP                | fructose-1-6-bisphosphatase              | pgCPSII             | carbamoyl-phosphate synthase                                             |
| FBA I               | fructose-bisphosphate aldolase class-I   | PGK                 | phosphoglycerate kinase                                                  |
| FBA II              | fructose-bisphosphate aldolase class-II  | PGM                 | phosphoglucomutase                                                       |
| Fe-NiR              | nitrite reductase (ferredoxin dependent) | PK                  | pyruvate kinase                                                          |
| FH                  | fumarate hydratase                       | PPDK                | pyruvate                                                                 |
| GAPDH               | glyceraldehyde 3-phosphate dehydrogenase | rbcL                | ribulose-bisphosphate carboxylase                                        |
| GCS                 | glutamate-cysteine ligase                | rbcS                | ribulose-bisphosphate carboxylase                                        |
| GDCP                | glycine decarboxylase-p-protein          | RPE                 | ribulose-5-phosphate epimerase                                           |
| GDCT                | glycine decarboxylase-t-protein          | RPI                 | ribose-5-phosphate isomerase                                             |
| GDH                 | glutamate dehydrogenase                  | RuBisCO             | ribulose-bisphosphate carboxylase                                        |
| GDH                 | glutamate dehydrogenase                  | SRM                 | spermidine synthase                                                      |
| GOGAT               | glutamate synthase                       | SUCLA               | succinate CoA synthetase                                                 |
| GPI                 | glucose-6-phosphate isomerase            | TP                  | triosephosphate                                                          |

|       |                       |                      |                               |
|-------|-----------------------|----------------------|-------------------------------|
| GR    | glutathione reductase | TPI                  | triosephosphate isomerase     |
| GRX   | glutaredoxin          | TXN                  | thioredoxin                   |
| GSI   | glutamine synthase    | unCPS<br>(CPSaseIII) | carbamoyl-phosphate synthase  |
| GSII  | glutamine synthetase  | Ure                  | urease                        |
| GSIII | glutamine synthetase  | URT                  | Na/urea-polyamine transporter |
| GSS   | glutathion synthetase |                      |                               |

606

607 Table 2: Proteins involved in carbon metabolism that are significantly up- or down- regulated in *T. oceanica* (CCMP  
608 1003) under chronic Cu limitation.

| Gene name <sup>a</sup> | Protein name                                    | Fold change expression under low Cu <sup>b</sup> | Pathway <sup>c</sup> | Compartment <sup>d</sup> |
|------------------------|-------------------------------------------------|--------------------------------------------------|----------------------|--------------------------|
| cbbX, THAOC_24360      | cbbX, rubisco expression protein                | <b>-2.3</b>                                      | CBB                  | Chl                      |
| THAOC_00388            | FBA II, fructose-bisphosphate aldolase class-II | 1.4                                              | CBB, G               | Chl                      |
| THAOC_12069            | FBA II, fructose-bisphosphate aldolase class-II | <b>2.0</b>                                       | CBB, G               | Chl                      |
| THAOC_13085            | GAPDH, glyceraldehyde 3-phosphate dehydrogenase | <b>-4.2</b>                                      | CBB, G               | Chl                      |
| THAOC_07617            | PGK, phosphoglycerate kinase                    | <b>6.9</b>                                       | CBB, G               | Chl                      |
| THAOC_35826            | TPI1, triose-phosphate isomerase                | 1.9                                              | CBB, G               | Chl                      |
| THAOC_02438            | TPI2, triose-phosphate isomerase                | <b>3.3</b>                                       | CBB, G               | Chl                      |
| THAOC_32006            | TPI3, triose-phosphate isomerase                | 1.5                                              | CBB, G               | Chl                      |
| THAOC_34936            | ENO, Enolase                                    | 1.5                                              | G                    | M                        |
| THAOC_24978            | FBA I, fructose-bisphosphate aldolase class-I   | -1.6                                             | G                    | Cyt                      |
| THAOC_24977            | FBA II, fructose-bisphosphate aldolase class-II | -1.2                                             | G                    | Cyt                      |
| THAOC_33331            | GAPDH, glyceraldehyde 3-phosphate dehydrogenase | <b>3.8</b>                                       | G                    | M                        |
| THAOC_16559            | PFK, phosphofructokinase                        | -1.8                                             | G                    | Cyt                      |
| THAOC_21902            | PGAM2, phosphoglycerate mutase                  | <b>-2.3</b>                                      | G                    | Chl                      |
| THAOC_06412            | PGM, phosphoglucomutase                         | <b>-3.2</b>                                      | G                    | Cyt                      |
| THAOC_34937            | PK, pyruvate kinase                             | 1.6                                              | G                    | Cyt                      |
| THAOC_07097            | PK, pyruvate kinase                             | -1.3                                             | G                    | M                        |
| THAOC_20545            | ACO, aconitase hydratase                        | <b>-4.7</b>                                      | TCA                  | M                        |
| THAOC_37807            | IDH, isocitrate/ isopropylmalate dehydrogenase  | -1.6                                             | TCA                  | M                        |
| THAOC_34595            | IDH1, isocitrate dehydrogenase (monomeric)      | <b>-3.0</b>                                      | TCA                  | M                        |
| THAOC_03405            | MDH1, malate dehydrogenase                      | 1.6                                              | TCA,<br>Mal          | M                        |
| THAOC_16827            | AAT, aspartate aminotransferase                 | <b>-2.3</b>                                      | Mal                  | Chl                      |
| THAOC_15049            | AAT, aspartate aminotransferase                 | <b>3.6</b>                                       | Mal                  | M                        |
| THAOC_30817            | MDH2, malate dehydrogenase,                     | <b>2.6</b>                                       | Mal                  | Chl                      |
| THAOC_31413            | PC(2), pyruvate carboxylase                     | <b>2.6</b>                                       | Mal                  | Chl                      |

609 <sup>a</sup>gene name as per Lommer *et al*, 2012

610 <sup>b</sup>average fold-change in Cu-limited compared to control cultures, bold indicates highly differentially expressed (> ±  
611 2-fold,  $p < 0.05$ ), otherwise differential expression ratio of ±1.3- to 2-fold ( $p < 0.05$ )

612 <sup>c</sup>metabolic pathway in which the protein is involved: CBB, Calvin-Benson-Bassham Cycle; G, glycolysis; Mal,  
613 malate shunt; TCA, tricarboxylic acid cycle

614 <sup>d</sup>predicted cellular localization of protein: Chl, chloroplast; Cyt, cytoplasm; M, mitochondrion

615 Table 3: Proteins involved in nitrogen and stress response metabolism that are significantly up- or down- regulated  
616 in *T. oceanica* (CCMP 1003) under chronic Cu limitation.

| Gene name <sup>a</sup> | Protein name                                                  | fold change expression under low Cu <sup>b</sup> | Pathway <sup>c</sup> | Compartment <sup>d</sup> |
|------------------------|---------------------------------------------------------------|--------------------------------------------------|----------------------|--------------------------|
| THAOC_15049            | AAT, aspartate aminotransferase                               | <b>3.6</b>                                       | N                    | M                        |
| THAOC_16827            | AAT, aspartate aminotransferase                               | <b>-2.3</b>                                      | N                    | Chl                      |
| THAOC_02363            | Fe-NiR, nitrite/sulfite reductase ferredoxin-like half-domain | <b>2.3</b>                                       | N                    | Chl                      |
| THAOC_00016            | Fe-NiR, nitrite/sulfite reductase ferredoxin-like half-domain | <b>1.3</b>                                       | N                    | Chl                      |
| THAOC_31900            | GSII, glutamine synthetase                                    | 1.7                                              | N                    | Chl                      |
| THAOC_06032            | GSIII, glutamine synthetase                                   | <b>-5.3</b>                                      | N                    | M                        |
| THAOC_34460            | NR, nitrate reductase                                         | 1.5                                              | N                    | Cyt                      |
| THAOC_00016            | NR, nitrite reductase                                         | 1.3                                              | N                    | Chl                      |
| THAOC_04919            | NRT, nitrate/nitrite transporter                              | <b>11.0</b>                                      | N                    | Trans                    |
| THAOC_04380            | OCD, ornithine cyclodeaminase                                 | 1.2                                              | N                    | Cyt                      |
| THAOC_05385            | OTC, ornithine carbamoyltransferase                           | 1.7                                              | N                    | M                        |
| THAOC_22108            | SRM, spermidine synthase                                      | <b>2.3</b>                                       | N                    | Cyt                      |
| THAOC_31656            | URT, Na/urea-polyamine transporter                            | <b>6.9</b>                                       | N                    | Trans                    |
| THAOC_13288            | GOGAT, glutamate synthase                                     | 1.6                                              | N, ROS               | Chl                      |
| THAOC_37364            | APX, ascorbate peroxidase                                     | 1.4                                              | ROS                  | Cyt                      |
| THAOC_27524            | CYS, cysteine synthase                                        | <b>2.5</b>                                       | ROS                  | Chl                      |
| THAOC_10442            | CYS2, cysteine synthase                                       | 1.5                                              | ROS                  | Chl                      |
| THAOC_07268            | GR, glutathione reductase                                     | <b>2.5</b>                                       | ROS                  | Chl                      |
| THAOC_07269            | GRX, glutaredoxin                                             | -1.3                                             | ROS                  | Chl                      |
| THAOC_18234            | GRX, glutaredoxin                                             | -1.3                                             | ROS                  | Chl                      |
| THAOC_09062            | GST, glutathione-S-transferase                                | <b>7.3</b>                                       | ROS                  | Cyt                      |
| THAOC_02860            | MnSOD, Mn/Fe binding superoxide dismutase                     | 1.8                                              | ROS                  | Chl                      |
| THAOC_10112            | NiSOD, nickel-dependent superoxide dismutase                  | 1.4                                              | ROS                  | Cyt                      |
| THAOC_05213            | TXN, thioredoxin                                              | <b>4.2</b>                                       | ROS                  | Cyt                      |
| THAOC_13865            | TXN, thioredoxin                                              | 1.8                                              | ROS                  | M                        |
| THAOC_31425            | TXN, thioredoxin                                              | 1.5                                              | ROS                  | Chl                      |

617 <sup>a</sup>gene name as per Lommer *et al*, 2012

618 <sup>b</sup>average fold-change in Cu-limited compared to control cultures, bold indicates highly differentially expressed (> ±  
619 2-fold, *p*<0.05), otherwise differential expression ratio of ±1.3- to 2-fold (*p*<0.05)

620 <sup>c</sup>metabolic pathway in which the protein is involved: N, nitrogen metabolism; ROS, reactive oxygen species  
621 metabolism

622 <sup>d</sup>predicted cellular localization of protein: Chl, chloroplast; Cyt, cytoplasm; M, mitochondrion; TRANS,  
623 transmembrane



624 Table 4: Fructose-bisphosphate aldolase (FBA) isoenzymes in *P. tricornutum* (Pt) and homologs in *T. oceanica* (To,  
625 CCMP 1003). Information on *P. tricornutum* as per Allen *et al* (2012).

626

| Gene name (Pt) <sup>a</sup> | FBA class <sup>b</sup> | Phylogenetic ancestry <sup>c</sup>                                                                     | Location in Pt <sup>d</sup>                | Pt id <sup>e</sup> | Pt mRNA lowFe <sup>f</sup> | To homolog <sup>g</sup> | protein ratio lowCu <sup>h</sup> |
|-----------------------------|------------------------|--------------------------------------------------------------------------------------------------------|--------------------------------------------|--------------------|----------------------------|-------------------------|----------------------------------|
| FbaC1                       | Class II               | Chromalveolate specific gene duplication of FbaC2 prior to diversification                             | Chloroplast, Pyrenoid                      | Bd825              | ↑ >25                      | To00388                 | ↑ (1.4)                          |
| FbaC2                       | Class II               | Endosymbiotic gene transfer from prasinophyte-like green algal ancestor                                | Chloroplast, diffuse                       | Pt22993            | ↓ <20                      | To12069                 | ↑ (2.0)                          |
| Fba3                        | Class II               | Heterokont host of secondary endosymbiosis                                                             | Cytosol                                    | Pt29014            | ↑ >10                      | To24977                 | ±                                |
| Fba4                        | Class I                | Bacterial like (unknown in non-diatom eukaryotes)                                                      | Cytosol, putative cytoskeletal interaction | Pt42447            | ~1                         | To24978                 | ↓ (-2.8)                         |
| FbaC5                       | Class I                | Endosymbiotic gene transfer from red algal ancestor (with selective gene loss in some centric diatoms) | Chloroplast, Pyrenoid                      | Pt51289            | ↑ >80                      | To02112                 | ±                                |

627 <sup>a</sup>as per Allen *et al* (2012)

628 <sup>b</sup>Class I uses a metal co-factor, Class II uses a Schiff base

629 <sup>c</sup>as per Allen *et al* (2012)

630 <sup>d</sup>as per Allen *et al* (2012) using GFP-fusion proteins

631 <sup>e</sup>NCBI identifier

632 <sup>f</sup>fold-change of mRNA transcript levels in acute Fe limited vs. Fe replete cultures; arrows indicating up- and down-regulation

633 <sup>g</sup>as per blastP search

634 <sup>h</sup>fold change of protein levels in chronic Cu limited vs. Cu replete cultures

635 FBA, fructose-bisphosphate aldolase; Pt, *Phaeodactylum tricornutum*; To, *Thalassiosira oceanica*

636

637 **Figure Legends**

638 Fig. 1: **Overview of proteomics data for *T. oceanica* CCMP 1003 (TO03) and 1005 (TO05) grown in Cu-**  
639 **limiting conditions. A-C Venn diagrams of distinct identified proteins in the original datasets of TO03 and**  
640 **TO05: A) All proteins; B) significantly up-regulated proteins; C) significantly down-regulated proteins. Note that**  
641 **even though only 50% of the proteins identified in TO05 were identified in TO03, in TO03 there were three times**  
642 **more significantly up-regulated proteins and five times more significantly down-regulated proteins than in TO05.**

643  
644 Fig. 2: **Bar charts of second level Kegg Orthology (KO) identifiers associated with proteins of original TO03**  
645 **dataset comparing proportions between all proteins and those that are significantly up- or down-regulated.**  
646 **Numbers in brackets indicate absolute protein numbers in each set. Note that certain aspects of metabolism are most**  
647 **highly affected: energy, amino acid and carbohydrate metabolism**

648  
649 Fig. 3: **Relative expression of proteins involved in the Calvin Benson Bassham and citrate (TCA) cycle. Boxes**  
650 **indicate proteins with their abbreviated name and known *T. pseudonana* (Tp) and *T. oceanica* (To) homologs. The**  
651 **colors of the boxes indicate expression in *T. oceanica* TO03 under low Cu: dark red, highly up-regulated (>2-fold,**  
652  **$p < 0.05$ ); light pink, up-regulated by 1.3 to 2-fold ( $p < 0.05$ ); dark blue, highly down-regulated (>2-fold,  $p < 0.05$ ); light**  
653 **blue, down-regulated by 1.3 to 2-fold ( $p < 0.05$ ); white, expressed in TO03; grey border around box, found in *T.***  
654 ***oceanica* T005 genome but not expressed in TO03 proteomic data; grey, dashed border around box, no putative**  
655 **homologs in the *T. oceanica* genome.**

656 **Protein abbreviations:** ACO, aconitase hydratase; cbbX, rubisco expression protein; CS, citrate synthase; DLDH,  
657 dihydrolipoamide dehydrogenase; FBA I, fructose-bisphosphate aldolase class-I; FBA II, fructose-bisphosphate  
658 aldolase class-II; FH, fumarate hydratase; GAPDH, glyceraldehyde 3-phosphate dehydrogenase; GPI, glucose-6-  
659 phosphate isomerase; IDH, isocitrate dehydrogenase; MDH, malate dehydrogenase; OGD, 2-oxoglutarate  
660 dehydrogenase; PC, pyruvate carboxylase; PDH, pyruvate dehydrogenase; PFK, phosphofructokinase; PGAM,  
661 phosphoglycerate mutase; PGK, phosphoglycerate kinase; PGM, phosphoglucomutasePK, pyruvate kinase; rbcL,  
662 ribulose-bisphosphate carboxylase large chain; rbcS, ribulose-bisphosphate carboxylase small chain; RPE, ribulose-  
663 5-phosphate epimerase; RPI, ribose-5-Phosphate-isomerase; SUCLA, succinate CoA synthetase; TPI, triose-  
664 phosphate isomerase

665 **Compound abbreviations:** 1,3- bisPG, 1,3-bisphosphateglycerate; G3P, glucose-3-phosphate; Ery-4-P, erythrose 4  
666 phosphate; Sedo-1,7-bisP, sedoheptulose 1 7-bisphosphate; Rib-1,5-bisP, ribulose-1,5-bisphosphate; DHAP,  
667 dihydroxyacetone phosphate; Fru-1,6-bis-P, fructose 1,6-bisphosphate; Fru-6-P, fructose 6-phosphate; GAP,  
668 glyceraldehyde 3-phosphate;  $\text{HCO}_3^-$ , bicarbonate; OAA, oxaloacetate; TP, triose phosphate

669  
670 Fig. 4: **Relative expression of proteins involved in glycolysis in the three compartments (chloroplast,**  
671 **mitochondrion, cytosol), including Entner-Dourdoroff pathway. Boxes indicate proteins with their abbreviated**

672 name and known *T. pseudonana* (Tp) and *T. oceanica* (To) homologs. The colors of the boxes indicate expression in  
673 *T. oceanica* TO03 under low Cu: dark red, highly up-regulated (>2-fold,  $p < 0.05$ ); light pink, up-regulated by 1.3 to  
674 2-fold ( $p < 0.05$ ); dark blue, highly down-regulated (>2-fold,  $p < 0.05$ ); light blue, down-regulated by 1.3 to 2-fold  
675 ( $p < 0.05$ ); white, expressed in TO03; grey border around box, found in *T. oceanica* T005 genome but not expressed  
676 in TO03 proteomic data; grey, dashed border around box, no putative homologs in the *T. oceanica* genome.

677 **Protein abbreviations:** CBB cycle, Calvin Benson Bassham cycle, EDA, 2-keto-3-deoxy phosphogluconate  
678 aldolase; EDD, 6-phosphogluconate dehydratase; ENO, enolase; F2BP, fructose-1-6-bisphosphatase; FBA I,  
679 fructose-bisphosphate aldolase class-I; FBA II, fructose-bisphosphate aldolase class-II; GAPDH, glyceraldehyde 3-  
680 phosphate dehydrogenase; GPI, glucose-6-phosphate isomerase; PC, pyruvate carboxylase; PDH, pyruvate  
681 dehydrogenase; PFK, phosphofructokinase; PGAM, phosphoglycerate mutase; PGK, phosphoglycerate kinase;  
682 PGM, phosphoglucomutase; PK, pyruvate kinase; TCA, tricarboxylic acid cycle; TP, triose phosphate; TPI, triose-  
683 phosphate isomerase, TPT, triose phosphate transporter

684 **Compound abbreviations:** 1,3- bisPG, 1,3-bisphosphateglycerate; 2K3D-PG, 2-keto-3-deoxyphosphogluconate;  
685 2PG, 2-phosphoglycerate; 3PG, 3-phosphoglycerate; 6PG, 6-phosphogluconate; DHAP, dihydroxyacetone  
686 phosphate; Fru-1,6-bis-P, fructose 1,6-bisphosphate; Fru-6P, fructose 6-phosphate; GAP, glyceraldehyde 3-  
687 phosphate; Glu 6-P, glucose 6-phosphate;  $\text{HCO}_3^-$ , bicarbonate; OAA, oxaloacetate; PEP, phosphoenolpyruvate

688

689 Fig. 5: **Relative expression of proteins involved in nitrogen metabolism.** Boxes indicate proteins with their  
690 abbreviated name and known *T. pseudonana* (Tp) and *T. oceanica* (To) homologs. The colors of the boxes indicate  
691 expression in *T. oceanica* TO03 under low Cu: dark red, highly up-regulated (>2-fold,  $p < 0.05$ ); light pink, up-  
692 regulated by 1.3 to 2-fold ( $p < 0.05$ ); dark blue, highly down-regulated (>2-fold,  $p < 0.05$ ); light blue, down-regulated  
693 by 1.3 to 2-fold ( $p < 0.05$ ); white, expressed in TO03; grey border around box, found in *T. oceanica* T005 genome but  
694 not expressed in TO03 proteomic data; grey, dashed border around box, no putative homologs in the *T. oceanica*  
695 genome.

696 **Protein abbreviations:** AAT, aspartate aminotransferase; Agm, agmatinase; AMT, ammonium transporter; Arg,  
697 arginase; argD, n-acetylornithine aminotransferase; AsL, argininosuccinate lyase; AsuS, argininosuccinate synthase;  
698 ATCase, aspartate carbamoyltransferase; Fe-NiR, nitrite reductase (ferredoxin-dependent); GDGP, glycine  
699 decarboxylase p-protein; GDCT, glycine decarboxylase t-protein; GDH, glutamate dehydrogenase; GOGAT,  
700 glutamate synthase; GSI, glutamine synthase; GSII, glutamine synthetase; GSIII, glutamine synthetase; NAD(P)H-  
701 NiR, nitrite reductase (NAD(P)H dependent); NiRT, formate/nitrite transporter; NR, nitrate reductase; NRT,  
702 nitrate/nitrite transporter; OCD, ornithine cyclodeaminase; OdC, ornithine decarboxylase; OTC, ornithine  
703 carbamoyltransferase; pgCPSII, carbamoyl-phosphate synthase II; SRM, spermidine synthase; unCPS (CPSase III),  
704 carbamoyl-phosphate synthase; Ure, urease; URT, Na/urea-polyamine transporter.

705

706 Fig. 6: **Relative expression of proteins involved in the malate shunt.** Boxes indicate proteins with their  
707 abbreviated name and known *T. pseudonana* (Tp) and *T. oceanica* (To) homologs. The colors of the boxes indicate  
708 expression in *T. oceanica* TO03 under low Cu: dark red, highly up-regulated (>2-fold,  $p < 0.05$ ); light pink, up-

709 regulated by 1.3 to 2-fold ( $p < 0.05$ ); dark blue, highly down-regulated ( $> 2$ -fold,  $p < 0.05$ ); light blue, down-regulated  
710 by 1.3 to 2-fold ( $p < 0.05$ ); white, expressed in TO03; grey border around box, found in *T. oceanica* T005 genome but  
711 not expressed in TO03 proteomic data; grey, dashed border around box, no putative homologs in the *T. oceanica*  
712 genome.

713 **Abbreviations:** AAT, aspartate aminotransferase; MDH, malate dehydrogenase; ME, malic enzyme; OAA,  
714 oxaloacetate; PC, pyruvate carboxylase; PK, pyruvate kinase

715  
716 **Fig. 7: Relative expression of proteins involved in glutathione metabolism and response to reactive oxygen**  
717 **species (ROS).** Boxes indicate proteins with their abbreviated name and known *T. pseudonana* (Tp) and *T. oceanica*  
718 (To) homologs. The colors of the boxes indicate expression in *T. oceanica* TO03 under low Cu: dark red, highly up-  
719 regulated ( $> 2$ -fold,  $p < 0.05$ ); light pink, up-regulated by 1.3 to 2-fold ( $p < 0.05$ ); dark blue, highly down-regulated  
720 ( $> 2$ -fold,  $p < 0.05$ ); light blue, down-regulated by 1.3 to 2-fold ( $p < 0.05$ ); white, expressed in TO03; grey border  
721 around box, found in *T. oceanica* T005 genome but not expressed in TO03 proteomic data; grey, dashed border  
722 around box, no putative homologs in the *T. oceanica* genome.

723 **Protein and compound abbreviations:** APX, ascorbate peroxidase; Cys, cysteine; CYS, cysteine synthase;  
724 DHAR, dehydroascorbate reductase;  $\gamma$ -glu-cys,  $\gamma$ -glutamylcysteine; GCL, glutamate cysteine ligase; GDH,  
725 glutamate dehydrogenase, glu, glutamate; NADP dependent; GOGAT, glutamate synthase; GR, glutathione  
726 reductase; GRX, glutaredoxin; GSS, glutathione synthetase; GTR, glutathione transporter; TXN, thioredoxin

727

728

## 729 **References**

730

- 731 Allen, A.E., Dupont, C.L., Oborník, M., Horák, A., Nunes-Nesi, A., McCrow, J.P., Zheng, H.,  
732 Johnson, D.A., Hu, H., Fernie, A.R., Bowler, C., 2011. Evolution and metabolic  
733 significance of the urea cycle in photosynthetic diatoms. *Nature* 473, 203–207.  
734 <https://doi.org/10.1038/nature10074>
- 735 Allen, A.E., LaRoche, J., Maheswari, U., Lommer, M., Schauer, N., Lopez, P.J., Finazzi, G.,  
736 Fernie, A.R., Bowler, C., 2008. Whole-cell response of the pennate diatom  
737 *Phaeodactylum tricornutum* to iron starvation. *Proceedings of the National Academy of*  
738 *Sciences* 105, 10438–10443. <https://doi.org/10.1073/pnas.0711370105>
- 739 Allen, A.E., Moustafa, A., Montsant, A., Eckert, A., Kroth, P.G., Bowler, C., 2012. Evolution  
740 and Functional Diversification of Fructose Bisphosphate Aldolase Genes in  
741 Photosynthetic Marine Diatoms. *Mol Biol Evol* 29, 367–379.  
742 <https://doi.org/10.1093/molbev/msr223>
- 743 Allen, J.F., 2002. Photosynthesis of ATP—Electrons, Proton Pumps, Rotors, and Poise. *Cell*  
744 110, 273–276. [https://doi.org/10.1016/S0092-8674\(02\)00870-X](https://doi.org/10.1016/S0092-8674(02)00870-X)
- 745 Annett, A.L., Lapi, S., Ruth, T.J., Maldonado, M.T., 2008. The effects of Cu and Fe availability  
746 on the growth and Cu:C ratios of marine diatoms. *Limnol. Oceanogr.* 53, 2451–2461.  
747 <https://doi.org/10.4319/lo.2008.53.6.2451>

- 748 Armbrust, E.V., 2009. The life of diatoms in the world's oceans. *Nature* 459, 185–192.  
749 <https://doi.org/10.1038/nature08057>
- 750 Armbrust, E.V., Berges, J.A., Bowler, C., Green, B.R., Martinez, D., Putnam, N.H., Zhou, S.,  
751 Allen, A.E., Apt, K.E., Bechner, M., Brzezinski, M.A., Chaal, B.K., Chiovitti, A., Davis,  
752 A.K., Demarest, M.S., Detter, J.C., Glavina, T., Goodstein, D., Hadi, M.Z., Hellsten, U.,  
753 Hildebrand, M., Jenkins, B.D., Jurka, J., Kapitonov, V.V., Kröger, N., Lau, W.W.Y.,  
754 Lane, T.W., Larimer, F.W., Lippmeier, J.C., Lucas, S., Medina, M., Montsant, A.,  
755 Obornik, M., Parker, M.S., Palenik, B., Pazour, G.J., Richardson, P.M., Rynearson, T.A.,  
756 Saito, M.A., Schwartz, D.C., Thamtrakoln, K., Valentin, K., Vardi, A., Wilkerson, F.P.,  
757 Rokhsar, D.S., 2004. The Genome of the Diatom *Thalassiosira Pseudonana*: Ecology,  
758 Evolution, and Metabolism. *Science* 306, 79–86. <https://doi.org/10.1126/science.1101156>
- 759 Bailleul, B., Berne, N., Murik, O., Petroustos, D., Prihoda, J., Tanaka, A., Villanova, V., Bligny,  
760 R., Flori, S., Falconet, D., Krieger-Liszkay, A., Santabarbara, S., Rappaport, F., Joliot, P.,  
761 Tirichine, L., Falkowski, P.G., Cardol, P., Bowler, C., Finazzi, G., 2015. Energetic  
762 coupling between plastids and mitochondria drives CO<sub>2</sub> assimilation in diatoms. *Nature*  
763 524, 366–369. <https://doi.org/10.1038/nature14599>
- 764 Balmer, Y., Koller, A., Val, G. del, Manieri, W., Schürmann, P., Buchanan, B.B., 2003.  
765 Proteomics gives insight into the regulatory function of chloroplast thioredoxins. *PNAS*  
766 100, 370–375. <https://doi.org/10.1073/pnas.232703799>
- 767 Bowler, C., Allen, A.E., Badger, J.H., Grimwood, J., Jabbari, K., Kuo, A., Maheswari, U.,  
768 Martens, C., Maumus, F., Otilar, R.P., Rayko, E., Salamov, A., Vandepoele, K.,  
769 Beszteri, B., Gruber, A., Heijde, M., Katinka, M., Mock, T., Valentin, K., Verret, F.,  
770 Berges, J.A., Brownlee, C., Cadoret, J.-P., Chiovitti, A., Choi, C.J., Coesel, S., De  
771 Martino, A., Detter, J.C., Durkin, C., Falciatore, A., Fournet, J., Haruta, M., Huysman,  
772 M.J.J., Jenkins, B.D., Jiroutova, K., Jorgensen, R.E., Joubert, Y., Kaplan, A., Kröger, N.,  
773 Kroth, P.G., La Roche, J., Lindquist, E., Lommer, M., Martin-Jézéquel, V., Lopez, P.J.,  
774 Lucas, S., Mangogna, M., McGinnis, K., Medlin, L.K., Montsant, A., Secq, M.-P.O.,  
775 Napoli, C., Obornik, M., Parker, M.S., Petit, J.-L., Porcel, B.M., Poulsen, N., Robison,  
776 M., Rychlewski, L., Rynearson, T.A., Schmutz, J., Shapiro, H., Siaux, M., Stanley, M.,  
777 Sussman, M.R., Taylor, A.R., Vardi, A., von Dassow, P., Vyverman, W., Willis, A.,  
778 Wyrwicz, L.S., Rokhsar, D.S., Weissenbach, J., Armbrust, E.V., Green, B.R., Van de  
779 Peer, Y., Grigoriev, I.V., 2008. The *Phaeodactylum* genome reveals the evolutionary  
780 history of diatom genomes. *Nature* 456, 239–244. <https://doi.org/10.1038/nature07410>
- 781 Broddrick, J.T., Du, N., Smith, S.R., Tsuji, Y., Jallet, D., Ware, M.A., Peers, G., Matsuda, Y.,  
782 Dupont, C.L., Mitchell, B.G., Palsson, B.O., Allen, A.E., 2019. Cross-compartment  
783 metabolic coupling enables flexible photoprotective mechanisms in the diatom  
784 *Phaeodactylum tricornutum*. *New Phytologist* 222, 1364–1379.  
785 <https://doi.org/10.1111/nph.15685>
- 786 Emanuelsson, O., Brunak, S., von Heijne, G., Nielsen, H., 2007. Locating proteins in the cell  
787 using TargetP, SignalP and related tools. *Nat. Protocols* 2, 953–971.  
788 <https://doi.org/10.1038/nprot.2007.131>
- 789 Ewe, D., Tachibana, M., Kikutani, S., Gruber, A., Río Bártulos, C., Konert, G., Kaplan, A.,  
790 Matsuda, Y., Kroth, P.G., 2018. The intracellular distribution of inorganic carbon fixing  
791 enzymes does not support the presence of a C<sub>4</sub> pathway in the diatom *Phaeodactylum*  
792 *tricornutum*. *Photosynth Res* 137, 263–280. <https://doi.org/10.1007/s11120-018-0500-5>

- 793 Fabris, M., Matthijs, M., Rombauts, S., Vyverman, W., Goossens, A., Baart, G.J.E., 2012. The  
794 metabolic blueprint of *Phaeodactylum tricornutum* reveals a eukaryotic Entner–  
795 Doudoroff glycolytic pathway. *The Plant Journal* 70, 1004–1014.  
796 <https://doi.org/10.1111/j.1365-313X.2012.04941.x>
- 797 Field, C.B., Behrenfeld, M.J., Randerson, J.T., Falkowski, P., 1998. Primary Production of the  
798 Biosphere: Integrating Terrestrial and Oceanic Components. *Science* 281, 237–240.  
799 <https://doi.org/10.1126/science.281.5374.237>
- 800 Finazzi, G., Moreau, H., Bowler, C., 2010. Genomic insights into photosynthesis in eukaryotic  
801 phytoplankton. *Trends in Plant Science* 15, 565–572.  
802 <https://doi.org/10.1016/j.tplants.2010.07.004>
- 803 Flori, S., Jouneau, P.-H., Bailleul, B., Gallet, B., Estrozi, L.F., Moriscot, C., Bastien, O., Eicke,  
804 S., Schober, A., Bártulos, C.R., Maréchal, E., Kroth, P.G., Petroustos, D., Zeeman, S.,  
805 Breyton, C., Schoehn, G., Falconet, D., Finazzi, G., 2017. Plastid thylakoid architecture  
806 optimizes photosynthesis in diatoms. *Nat Commun* 8, 1–9.  
807 <https://doi.org/10.1038/ncomms15885>
- 808 Foyer, C.H., Noctor, G., 2011. Ascorbate and Glutathione: The Heart of the Redox Hub. *Plant*  
809 *Physiol.* 155, 2–18. <https://doi.org/10.1104/pp.110.167569>
- 810 Gallogly, M.M., Mieyal, J.J., 2007. Mechanisms of reversible protein glutathionylation in redox  
811 signaling and oxidative stress. *Current Opinion in Pharmacology,*  
812 *Cancer/Immunomodulation* 7, 381–391. <https://doi.org/10.1016/j.coph.2007.06.003>
- 813 Gruber, A., Kroth, P.G., 2017. Intracellular metabolic pathway distribution in diatoms and tools  
814 for genome-enabled experimental diatom research. *Phil. Trans. R. Soc. B* 372, 20160402.  
815 <https://doi.org/10.1098/rstb.2016.0402>
- 816 Gruber, A., Kroth, P.G., 2014. Deducing Intracellular Distributions of Metabolic Pathways from  
817 Genomic Data, in: Sriram, G. (Ed.), *Plant Metabolism*. Humana Press, Totowa, NJ, pp.  
818 187–211. [https://doi.org/10.1007/978-1-62703-661-0\\_12](https://doi.org/10.1007/978-1-62703-661-0_12)
- 819 Gruber, A., Rocap, G., Kroth, P.G., Armbrust, E.V., Mock, T., 2015. Plastid proteome prediction  
820 for diatoms and other algae with secondary plastids of the red lineage. *Plant J* 81, 519–  
821 528. <https://doi.org/10.1111/tpj.12734>
- 822 Gruber, A., Weber, T., Bártulos, C.R., Vugrinec, S., Kroth, P.G., 2009. Intracellular distribution  
823 of the reductive and oxidative pentose phosphate pathways in two diatoms. *J. Basic*  
824 *Microbiol.* 49, 58–72. <https://doi.org/10.1002/jobm.200800339>
- 825 Guo, J., Green, B.R., Maldonado, M.T., 2015. Sequence Analysis and Gene Expression of  
826 Potential Components of Copper Transport and Homeostasis in *Thalassiosira*  
827 *pseudonana*. *Protist* 166, 58–77. <https://doi.org/10.1016/j.protis.2014.11.006>
- 828 Guo, J., Lapi, S., Ruth, T.J., Maldonado, M.T., 2012. The Effects of Iron and Copper  
829 Availability on the Copper Stoichiometry of Marine Phytoplankton1. *Journal of*  
830 *Phycology* 48, 312–325. <https://doi.org/10.1111/j.1529-8817.2012.01133.x>
- 831 Heineke, D., Riens, B., Grosse, H., Hoferichter, P., Peter, U., Flügge, U.-I., Heldt, H.W., 1991.  
832 Redox Transfer across the Inner Chloroplast Envelope Membrane. *Plant Physiol.* 95,  
833 1131–1137. <https://doi.org/10.1104/pp.95.4.1131>
- 834 Hippmann, A.A., Schuback, N., Moon, K.-M., McCrow, J.P., Allen, A.E., Foster, L.J., Green,  
835 B.R., Maldonado, M.T., 2017. Contrasting effects of copper limitation on the  
836 photosynthetic apparatus in two strains of the open ocean diatom *Thalassiosira oceanica*.  
837 *PLOS ONE* 12, e0181753. <https://doi.org/10.1371/journal.pone.0181753>

- 838 Hockin, N.L., Mock, T., Mulholland, F., Kopriva, S., Malin, G., 2012. The Response of Diatom  
839 Central Carbon Metabolism to Nitrogen Starvation Is Different from That of Green Algae  
840 and Higher Plants [W]. *Plant Physiol* 158, 299–312.  
841 <https://doi.org/10.1104/pp.111.184333>
- 842 Hoefnagel, M.H.N., Atkin, O.K., Wiskich, J.T., 1998. Interdependence between chloroplasts and  
843 mitochondria in the light and the dark. *Biochimica et Biophysica Acta (BBA) -*  
844 *Bioenergetics* 1366, 235–255. [https://doi.org/10.1016/S0005-2728\(98\)00126-1](https://doi.org/10.1016/S0005-2728(98)00126-1)
- 845 Kim, J., Fabris, M., Baart, G., Kim, M.K., Goossens, A., Vyverman, W., Falkowski, P.G., Lun,  
846 D.S., 2016. Flux balance analysis of primary metabolism in the diatom *Phaeodactylum*  
847 *tricornutum*. *Plant J* 85, 161–176. <https://doi.org/10.1111/tpj.13081>
- 848 Kim, J.-W., Price, N.M., 2017. The influence of light on copper-limited growth of an oceanic  
849 diatom, *Thalassiosira oceanica* (Coccolithophyceae). *J. Phycol.* n/a-n/a.  
850 <https://doi.org/10.1111/jpy.12563>
- 851 Kong, L., M. Price, N., 2020. Identification of copper-regulated proteins in an oceanic diatom,  
852 *Thalassiosira oceanica* 1005. *Metallomics* 12, 1106–1117.  
853 <https://doi.org/10.1039/D0MT00033G>
- 854 Kroth, P.G., Chiovitti, A., Gruber, A., Martin-Jezequel, V., Mock, T., Parker, M.S., Stanley,  
855 M.S., Kaplan, A., Caron, L., Weber, T., Maheswari, U., Armbrust, E.V., Bowler, C.,  
856 2008. A Model for Carbohydrate Metabolism in the Diatom *Phaeodactylum tricornutum*  
857 Deduced from Comparative Whole Genome Analysis. *PLOS ONE* 3, e1426.  
858 <https://doi.org/10.1371/journal.pone.0001426>
- 859 Lelong, A., Bucciarelli, E., Hégaret, H., Soudant, P., 2013. Iron and copper limitations  
860 differently affect growth rates and photosynthetic and physiological parameters of the  
861 marine diatom *Pseudo-nitzschia delicatissima*. *Limnol. Oceanogr.* 58, 613–623.  
862 <https://doi.org/10.4319/lo.2013.58.2.0613>
- 863 Levering, J., Broddrick, J., Dupont, C.L., Peers, G., Beerli, K., Mayers, J., Gallina, A.A., Allen,  
864 A.E., Palsson, B.O., Zengler, K., 2016. Genome-Scale Model Reveals Metabolic Basis of  
865 Biomass Partitioning in a Model Diatom. *PLOS ONE* 11, e0155038.  
866 <https://doi.org/10.1371/journal.pone.0155038>
- 867 Lombardi, A.T., Maldonado, M.T., 2011. The effects of copper on the photosynthetic response  
868 of *Phaeocystis cordata*. *Photosynth Res* 108, 77–87. [https://doi.org/10.1007/s11120-011-](https://doi.org/10.1007/s11120-011-9655-z)  
869 [9655-z](https://doi.org/10.1007/s11120-011-9655-z)
- 870 Lommer, M., Roy, A.-S., Schilhabel, M., Schreiber, S., Rosenstiel, P., LaRoche, J., 2010. Recent  
871 transfer of an iron-regulated gene from the plastid to the nuclear genome in an oceanic  
872 diatom adapted to chronic iron limitation. *BMC Genomics* 11, 718.  
873 <https://doi.org/10.1186/1471-2164-11-718>
- 874 Maldonado, M.T., Allen, A.E., Chong, J.S., Lin, K., Leus, D., Karpenko, N., Harris, S.L., 2006.  
875 Copper-dependent iron transport in coastal and oceanic diatoms. *Limnol. Oceanogr.* 51,  
876 1729–1743. <https://doi.org/10.4319/lo.2006.51.4.1729>
- 877 Maldonado, M.T., Hughes, M.P., Rue, E.L., Wells, M.L., 2002. The effect of Fe and Cu on  
878 growth and domoic acid production by *Pseudo-nitzschia multiseries* and *Pseudo-nitzschia*  
879 *australis*. *Limnol. Oceanogr.* 47, 515–526. <https://doi.org/10.4319/lo.2002.47.2.0515>
- 880 Moore, J.K., Doney, S.C., Lindsay, K., 2004. Upper ocean ecosystem dynamics and iron cycling  
881 in a global three-dimensional model. *Global Biogeochem. Cycles* 18, GB4028.  
882 <https://doi.org/10.1029/2004GB002220>

- 883 Moustafa, A., Beszteri, B., Maier, U.G., Bowler, C., Valentin, K., Bhattacharya, D., 2009.  
884 Genomic Footprints of a Cryptic Plastid Endosymbiosis in Diatoms. *Science* 324, 1724–  
885 1726. <https://doi.org/10.1126/science.1172983>
- 886 Mueller-Cajar, O., Stotz, M., Wendler, P., Hartl, F.U., Bracher, A., Hayer-Hartl, M., 2011.  
887 Structure and function of the AAA+ protein CbbX, a red-type Rubisco activase. *Nature*  
888 479, 194–199. <https://doi.org/10.1038/nature10568>
- 889 Nelson, D.M., Tréguer, P., Brzezinski, M.A., Leynaert, A., Quéguiner, B., 1995. Production and  
890 dissolution of biogenic silica in the ocean: Revised global estimates, comparison with  
891 regional data and relationship to biogenic sedimentation. *Global Biogeochem. Cycles* 9,  
892 359–372. <https://doi.org/10.1029/95GB01070>
- 893 Niyogi, K.K., 2000. Safety valves for photosynthesis. *Current Opinion in Plant Biology* 3, 455–  
894 460. [https://doi.org/10.1016/S1369-5266\(00\)00113-8](https://doi.org/10.1016/S1369-5266(00)00113-8)
- 895 Oborník, M., Green, B.R., 2005. Mosaic Origin of the Heme Biosynthesis Pathway in  
896 Photosynthetic Eukaryotes. *Mol Biol Evol* 22, 2343–2353.  
897 <https://doi.org/10.1093/molbev/msi230>
- 898 Oudot-Le Secq, M.-P.O.-L., Grimwood, J., Shapiro, H., Armbrust, E.V., Bowler, C., Green,  
899 B.R., 2007. Chloroplast genomes of the diatoms *Phaeodactylum tricornutum* and  
900 *Thalassiosira pseudonana*: comparison with other plastid genomes of the red lineage. *Mol*  
901 *Genet Genomics* 277, 427–439. <https://doi.org/10.1007/s00438-006-0199-4>
- 902 Peers, G., Price, N.M., 2006. Copper-containing plastocyanin used for electron transport by an  
903 oceanic diatom. *Nature* 441, 341–344. <https://doi.org/10.1038/nature04630>
- 904 Peers, G., Quesnel, S.-A., Price, N.M., 2005. Copper requirements for iron acquisition and  
905 growth of coastal and oceanic diatoms. *Limnol. Oceanogr.* 50, 1149–1158.  
906 <https://doi.org/10.4319/lo.2005.50.4.1149>
- 907 Petersen, T.N., Brunak, S., von Heijne, G., Nielsen, H., 2011. SignalP 4.0: discriminating signal  
908 peptides from transmembrane regions. *Nat Meth* 8, 785–786.  
909 <https://doi.org/10.1038/nmeth.1701>
- 910 Prihoda, J., Tanaka, A., Paula, W.B.M. de, Allen, J.F., Tirichine, L., Bowler, C., 2012.  
911 Chloroplast-mitochondria cross-talk in diatoms. *J. Exp. Bot.* 63, 1543–1557.  
912 <https://doi.org/10.1093/jxb/err441>
- 913 Río Bártulos, C., Rogers, M.B., Williams, T.A., Gentekaki, E., Brinkmann, H., Cerff, R., Liaud,  
914 M.-F., Hehl, A.B., Yarlett, N.R., Gruber, A., Kroth, P.G., van der Giezen, M., 2018.  
915 Mitochondrial Glycolysis in a Major Lineage of Eukaryotes. *Genome Biol Evol* 10,  
916 2310–2325. <https://doi.org/10.1093/gbe/evy164>
- 917 Scheibe, R., 2004. Malate valves to balance cellular energy supply. *Physiologia Plantarum* 120,  
918 21–26. <https://doi.org/10.1111/j.0031-9317.2004.0222.x>
- 919 Schober, A.F., Río Bártulos, C., Bischoff, A., Lepetit, B., Gruber, A., Kroth, P.G., 2019.  
920 Organelle Studies and Proteome Analyses of Mitochondria and Plastids Fractions from  
921 the Diatom *Thalassiosira pseudonana*. *Plant Cell Physiol* 60, 1811–1828.  
922 <https://doi.org/10.1093/pcp/pcz097>
- 923 Smith, S.R., Abbriano, R.M., Hildebrand, M., 2012. Comparative analysis of diatom genomes  
924 reveals substantial differences in the organization of carbon partitioning pathways. *Algal*  
925 *Research* 1, 2–16. <https://doi.org/10.1016/j.algal.2012.04.003>
- 926 Vizcaíno, J.A., Csordas, A., del-Toro, N., Dianas, J.A., Griss, J., Lavidas, I., Mayer, G., Perez-  
927 Riverol, Y., Reisinger, F., Ternent, T., Xu, Q.-W., Wang, R., Hermjakob, H., 2016. 2016



928 update of the PRIDE database and its related tools. *Nucleic Acids Res.* 44, D447-456.  
929 <https://doi.org/10.1093/nar/gkv1145>  
930 Weber, T., Gruber, A., Kroth, P.G., 2009. The Presence and Localization of Thioredoxins in  
931 Diatoms, Unicellular Algae of Secondary Endosymbiotic Origin. *Molecular Plant* 2, 468–  
932 477. <https://doi.org/10.1093/mp/ssp010>  
933 Zechmann, B., 2014. Compartment-specific importance of glutathione during abiotic and biotic  
934 stress. *Front Plant Sci* 5. <https://doi.org/10.3389/fpls.2014.00566>  
935

**A All**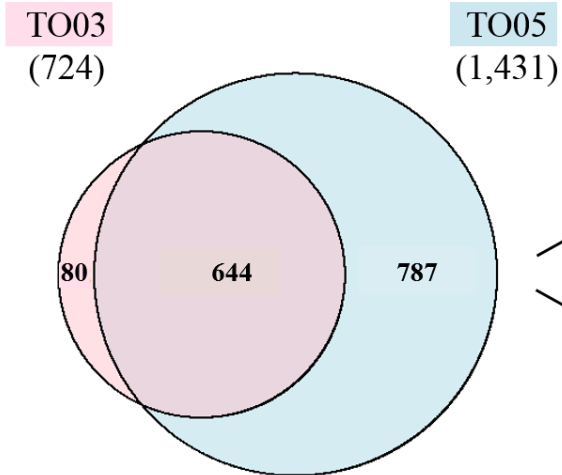**B sig UP**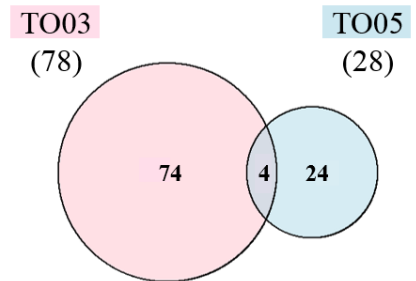**C sig DOWN**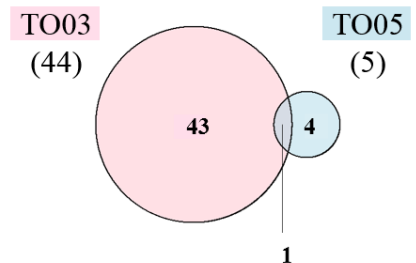

**Fig. 1: Overview of proteomics data for *T. oceanica* CCMP 1003 (TO03) and 1005 (TO05) grown in Cu-limiting conditions. A-C Venn diagrams of distinct identified proteins in the original datasets of TO03 and TO05: A) All proteins; B) significantly up-regulated proteins; C) significantly down-regulated proteins. Note that even though only 50% of the proteins identified in TO05 were identified in TO03, in TO03 there were three times more significantly up-regulated proteins and five times more significantly down-regulated proteins than in TO05.**

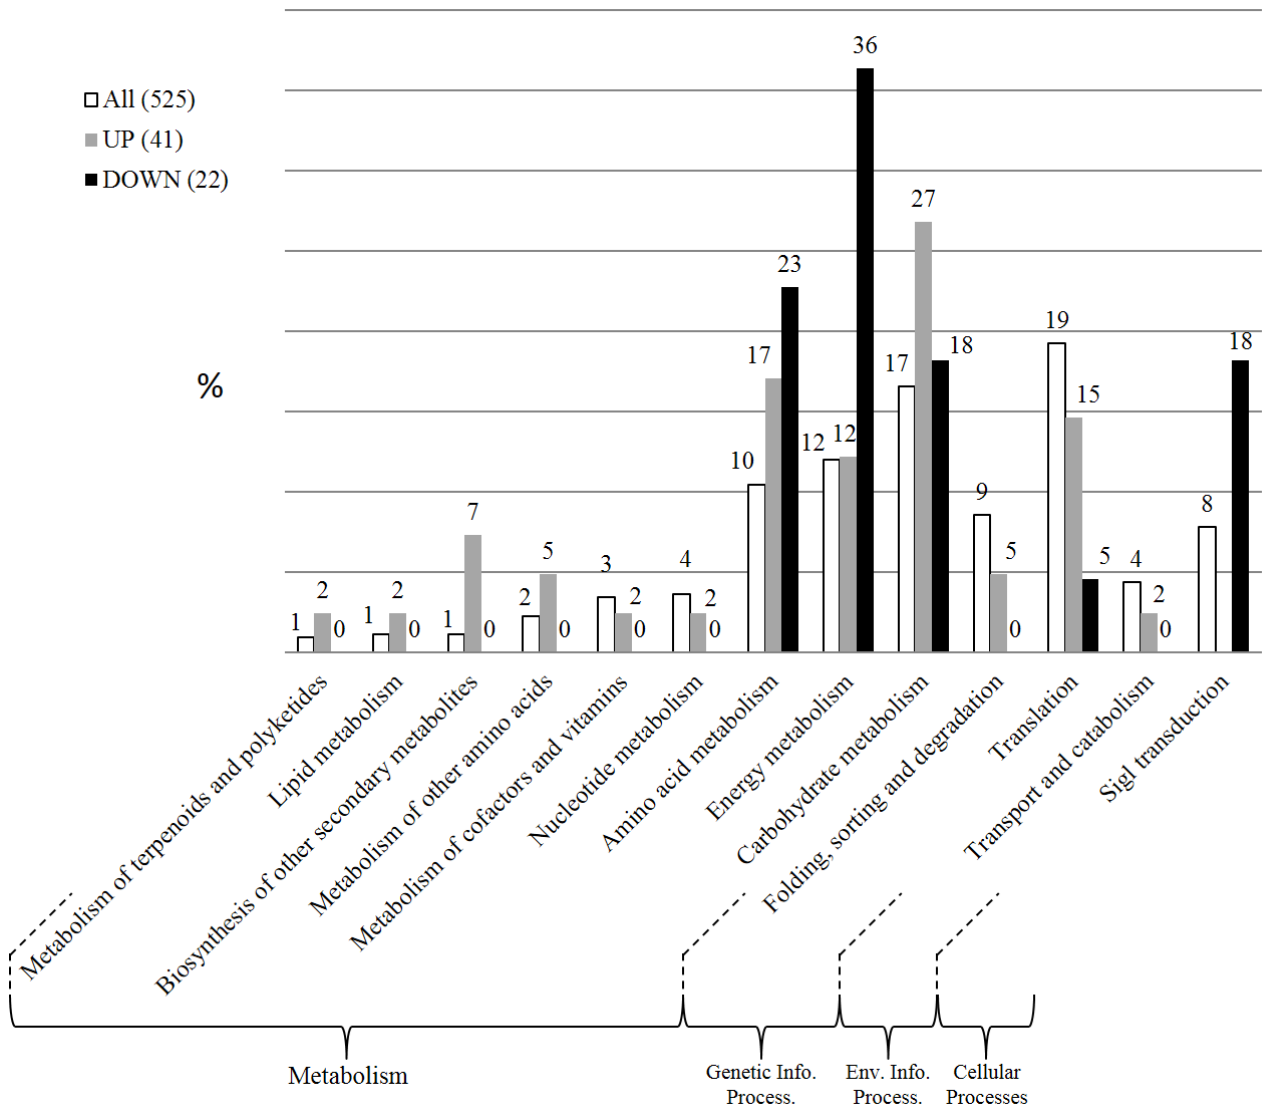

**Fig. 2: Bar charts of second level Kegg Orthology (KO) identifiers associated with proteins of original TO03 dataset comparing proportions between all proteins and those that are significantly up- or down-regulated.** Numbers in brackets indicate absolute protein numbers in each set. Note that certain aspects of metabolism are most highly affected: energy, amino acid and carbohydrate metabolism

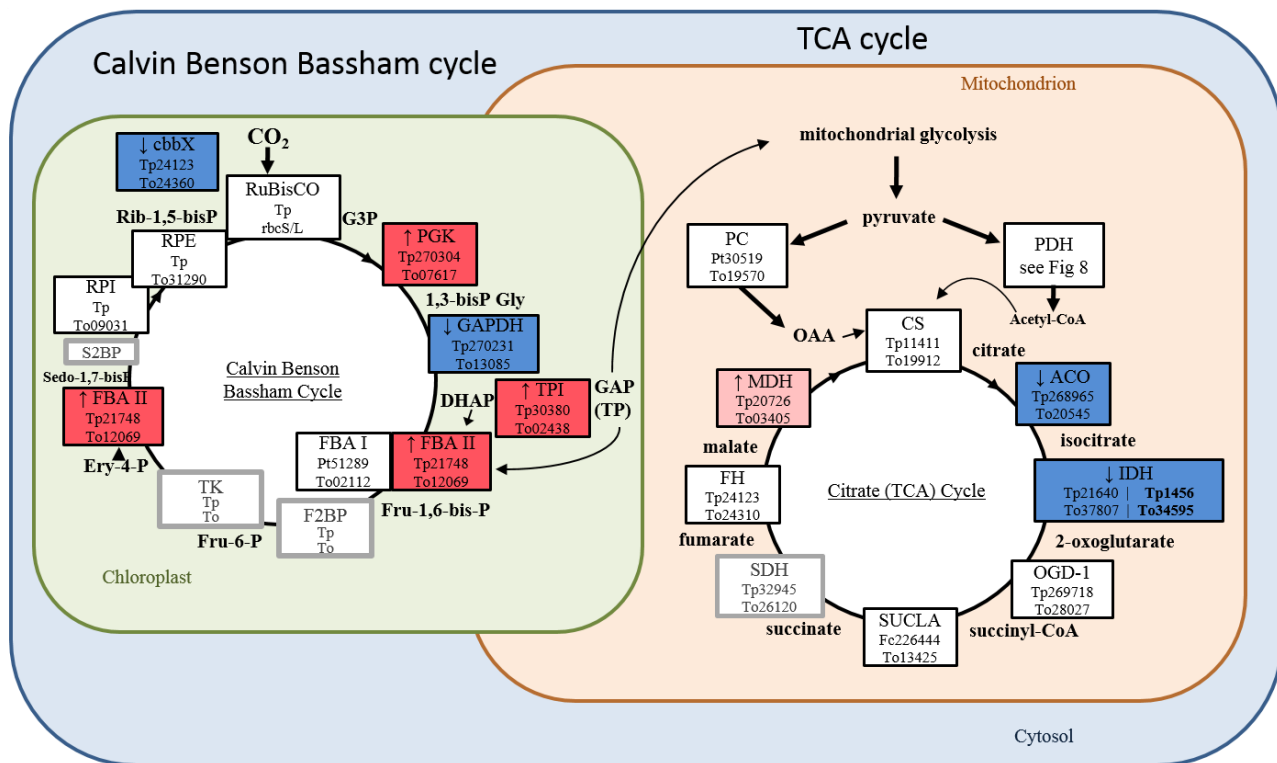

**Fig. 3: Relative expression of proteins involved in the Calvin Benson Bassham and citrate (TCA) cycle.** Boxes indicate proteins with their abbreviated name and known *T. pseudonana* (Tp) and *T. oceanica* (To) homologs. The colors of the boxes indicate expression in *T. oceanica* TO03 under low Cu: dark red, highly up-regulated (>2-fold,  $p < 0.05$ ); light pink, up-regulated by 1.3 to 2-fold ( $p < 0.05$ ); dark blue, highly down-regulated (>2-fold,  $p < 0.05$ ); light blue, down-regulated by 1.3 to 2-fold ( $p < 0.05$ ); white, expressed in TO03; grey border around box, found in *T. oceanica* T005 genome but not expressed in TO03 proteomic data; grey, dashed border around box, no putative homologs in the *T. oceanica* genome.

**Protein abbreviations:** ACO, aconitase hydratase; cbbX, rubisco expression protein; CS, citrate synthase; DLDH, dihydrolipoamide dehydrogenase; FBA I, fructose-bisphosphate aldolase class-I; FBA II, fructose-bisphosphate aldolase class-II; FH, fumarate hydratase; GAPDH, glyceraldehyde 3-phosphate dehydrogenase; GPI, glucose-6-phosphate isomerase; IDH, isocitrate dehydrogenase; MDH, malate dehydrogenase; OGD, 2-oxoglutarate dehydrogenase; PC, pyruvate carboxylase; PDH, pyruvate dehydrogenase; PFK, phosphofructokinase; PGAM, phosphoglycerate mutase; PGK, phosphoglycerate kinase; PGM, phosphoglucomutase; PK, pyruvate kinase; rbcL, ribulose-bisphosphate carboxylase large chain; rbcS, ribulose-bisphosphate carboxylase small chain; RPE, ribulose-5-phosphate epimerase; RPI, ribose-5-Phosphate-isomerase; SUCLA, succinate CoA synthetase; TPI, triose-phosphate isomerase

**Compound abbreviations:** 1,3- bisPG, 1,3-bisphosphateglycerate; G3P, glucose-3-phosphate; Ery-4-P, erythrose 4 phosphate; Sedo-1,7-bisP, sedoheptulose 1 7-bisphosphate; Rib-1,5-bisP, ribulose-1,5-bisphosphate; DHAP, dihydroxyacetone phosphate; Fru-1,6-bis-P, fructose 1,6-bisphosphate; Fru-6-P, fructose 6-phosphate; GAP, glyceraldehyde 3-phosphate;  $\text{HCO}_3^-$ , bicarbonate; OAA, oxaloacetate; TP, triose phosphate

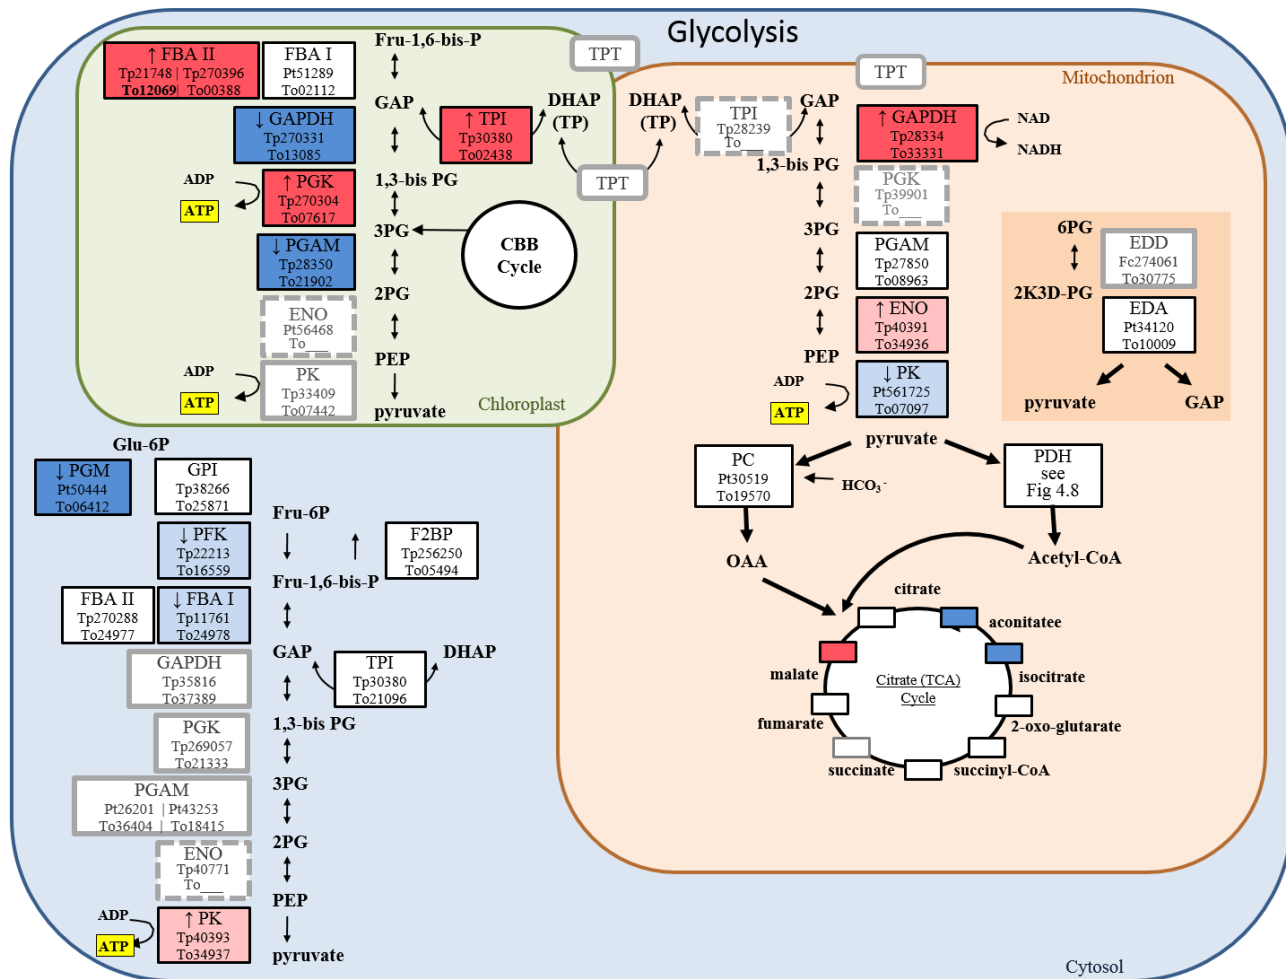

**Fig. 4: Relative expression of proteins involved in glycolysis in the three compartments (chloroplast, mitochondrion, cytosol), including Entner-Doudoroff pathway.** Boxes indicate proteins with their abbreviated name and known *T. pseudonana* (Tp) and *T. oceanica* (To) homologs. The colors of the boxes indicate expression in *T. oceanica* TO03 under low Cu: dark red, highly up-regulated (>2-fold,  $p < 0.05$ ); light pink, up-regulated by 1.3 to 2-fold ( $p < 0.05$ ); dark blue, highly down-regulated (>2-fold,  $p < 0.05$ ); light blue, down-regulated by 1.3 to 2-fold ( $p < 0.05$ ); white, expressed in TO03; grey border around box, found in *T. oceanica* T005 genome but not expressed in TO03 proteomic data; grey, dashed border around box, no putative homologs in the *T. oceanica* genome.

**Protein abbreviations:** CBB cycle, Calvin Benson Bassham cycle; EDA, 2-keto-3-deoxy phosphogluconate aldolase; EDD, 6-phosphogluconate dehydratase; ENO, enolase; F2BP, fructose-1-6-bisphosphatase; FBA I, fructose-bisphosphate aldolase class-I; FBA II, fructose-bisphosphate aldolase class-II; GAPDH, glyceraldehyde 3-phosphate dehydrogenase; GPI, glucose-6-phosphate isomerase; PC, pyruvate carboxylase; PDH, pyruvate dehydrogenase; PFK, phosphofruktokinase; PGAM, phosphoglycerate mutase; PGK, phosphoglycerate kinase; PGM, phosphoglucomutase; PK, pyruvate kinase; TCA, tricarboxylic acid cycle; TP, triose phosphate; TPI, triose-phosphate isomerase, TPT, triose phosphate transporter

**Compound abbreviations:** 1,3- bisPG, 1,3-bisphosphateglycerate; 2K3D-PG, 2-keto-3-deoxyphosphogluconate; 2PG, 2-phosphoglycerate; 3PG, 3-phosphoglycerate; 6PG, 6-phosphogluconate; DHAP, dihydroxyacetone phosphate; Fru-1,6-bis-P, fructose 1,6-bisphosphate; Fru-6P, fructose 6-phosphate; GAP, glyceraldehyde 3-phosphate; Glu 6-P, glucose 6-phosphate;  $\text{HCO}_3^-$ , bicarbonate; OAA, oxaloacetate; PEP, phosphoenolpyruvate

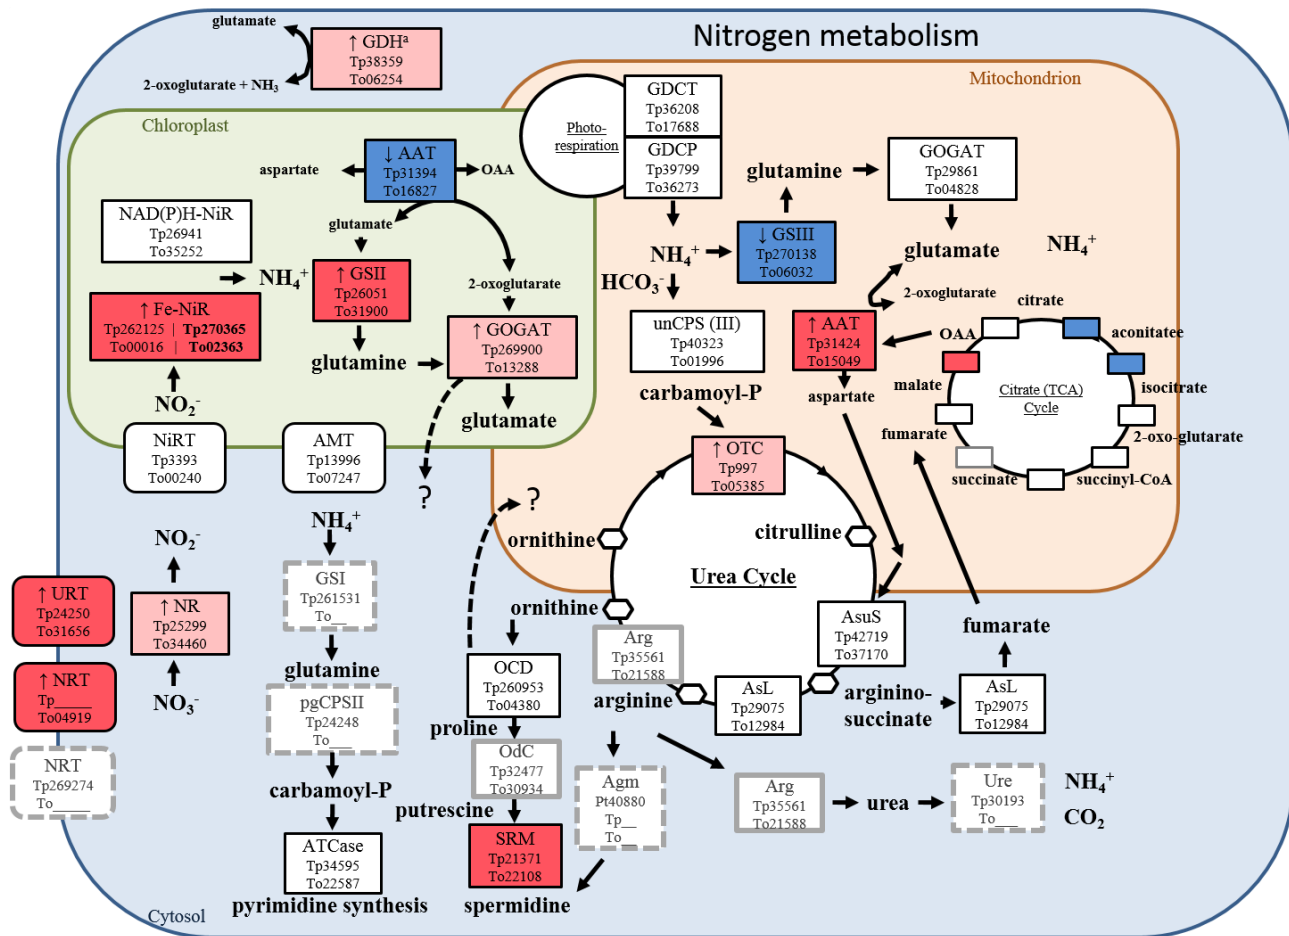

**Fig. 5: Relative expression of proteins involved in nitrogen metabolism.** Boxes indicate proteins with their abbreviated name and known *T. pseudonana* (Tp) and *T. oceanica* (To) homologs. The colors of the boxes indicate expression in *T. oceanica* TO03 under low Cu: dark red, highly up-regulated (>2-fold,  $p < 0.05$ ); light pink, up-regulated by 1.3 to 2-fold ( $p < 0.05$ ); dark blue, highly down-regulated (>2-fold,  $p < 0.05$ ); light blue, down-regulated by 1.3 to 2-fold ( $p < 0.05$ ); white, expressed in TO03; grey border around box, found in *T. oceanica* T005 genome but not expressed in TO03 proteomic data; grey, dashed border around box, no putative homologs in the *T. oceanica* genome.

**Protein abbreviations:** AAT, aspartate aminotransferase; Agm, agmatinase; AMT, ammonium transporter; Arg, arginase; argD, n-acetylornithine aminotransferase; AsL, argininosuccinate lyase; AsuS, argininosuccinate synthase; ATCase, aspartate carbamoyltransferase; Fe-NiR, nitrite reductase (ferredoxin-dependent); GDCT, glycine decarboxylase t-protein; GDPCP, glycine decarboxylase p-protein; GDH, glutamate dehydrogenase; GOGAT, glutamate synthase; GSI, glutamine synthase; GSII, glutamine synthetase; GSIII, glutamine synthetase; NAD(P)H-NiR, nitrite reductase (NAD(P)H dependent); NiRT, formate/nitrite transporter; NR, nitrate reductase; NRT, nitrate/nitrite transporter; OCD, ornithine cyclodeaminase; OdC, ornithine decarboxylase; OTC, ornithine carbamoyltransferase; pgCPSII, carbamoyl-phosphate synthase II; SRM, spermidine synthase; unCPS (CPSase III), carbamoyl-phosphate synthase; Ure, urease; URT, Na/urea-polyamine transporter.

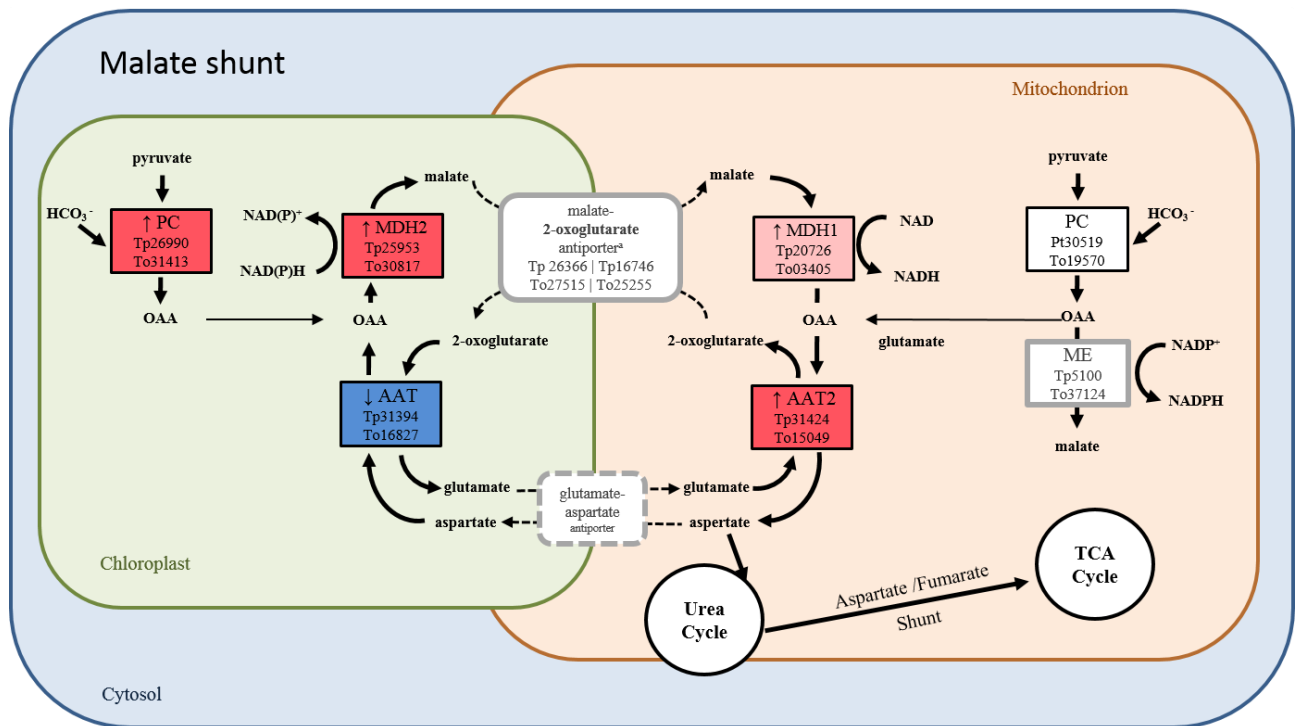

Fig. 6: **Relative expression of proteins involved in the malate shunt.** Boxes indicate proteins with their abbreviated name and known *T. pseudonana* (Tp) and *T. oceanica* (To) homologs. The colors of the boxes indicate expression in *T. oceanica* TO03 under low Cu: dark red, highly up-regulated (>2-fold,  $p < 0.05$ ); light pink, up-regulated by 1.3 to 2-fold ( $p < 0.05$ ); dark blue, highly down-regulated (>2-fold,  $p < 0.05$ ); light blue, down-regulated by 1.3 to 2-fold ( $p < 0.05$ ); white, expressed in TO03; grey border around box, found in *T. oceanica* T005 genome but not expressed in TO03 proteomic data; grey, dashed border around box, no putative homologs in the *T. oceanica* genome.

**Abbreviations:** AAT, aspartate aminotransferase; MDH, malate dehydrogenase; ME, malic enzyme; OAA, oxaloacetate; PC, pyruvate carboxylase; PK, pyruvate kinase

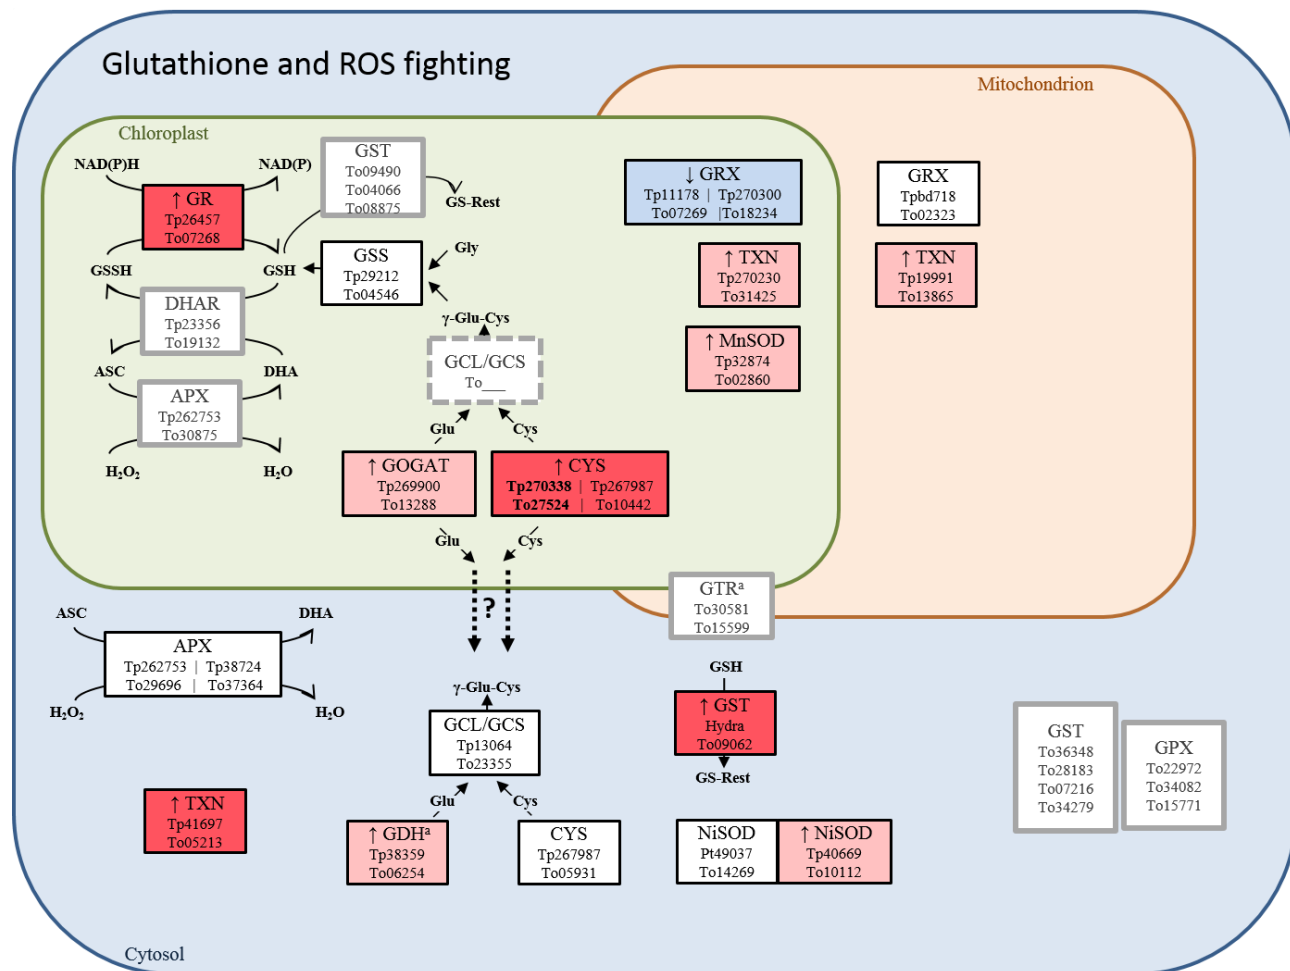

**Fig. 7: Relative expression of proteins involved in glutathione metabolism and response to reactive oxygen species (ROS).** Boxes indicate proteins with their abbreviated name and known *T. pseudonana* (Tp) and *T. oceanica* (To) homologs. The colors of the boxes indicate expression in *T. oceanica* TO03 under low Cu: dark red, highly up-regulated (>2-fold,  $p < 0.05$ ); light pink, up-regulated by 1.3 to 2-fold ( $p < 0.05$ ); dark blue, highly down-regulated (>2-fold,  $p < 0.05$ ); light blue, down-regulated by 1.3 to 2-fold ( $p < 0.05$ ); white, expressed in TO03; grey border around box, found in *T. oceanica* T005 genome but not expressed in TO03 proteomic data; grey, dashed border around box, no putative homologs in the *T. oceanica* genome.

**Protein and compound abbreviations:** APX, ascorbate peroxidase; Cys, cysteine; CYS, cysteine synthase; DHAR, dehydroascorbate reductase;  $\gamma$ -glu-cys,  $\gamma$ -glutamylcysteine; GCL, glutamate cysteine ligase; GDH, glutamate dehydrogenase, glu, glutamate; NADP dependent; GOGAT, glutamate synthase; GR, glutathione reductase; GRX, glutaredoxin; GSS, glutathione synthetase; GTR, glutathione transporter; TXN, thioredoxin



## Parsed Citations

- Allen, A.E., Dupont, C.L., Obornik, M., Horák, A., Nunes-Nesi, A., McCrow, J.P., Zheng, H., Johnson, D.A., Hu, H., Fernie, A.R., Bowler, C., 2011. Evolution and metabolic significance of the urea cycle in photosynthetic diatoms. *Nature* 473, 203–207. <https://doi.org/10.1038/nature10074>  
PubMed: [Author and Title](#)  
Google Scholar: [Author Only Title Only Author and Title](#)
- Allen, A.E., LaRoche, J., Maheswari, U., Lommer, M., Schauer, N., Lopez, P.J., Finazzi, G., Fernie, A.R., Bowler, C., 2008. Whole-cell response of the pennate diatom *Phaeodactylum tricornutum* to iron starvation. *Proceedings of the National Academy of Sciences* 105, 10438–10443. <https://doi.org/10.1073/pnas.0711370105>  
PubMed: [Author and Title](#)  
Google Scholar: [Author Only Title Only Author and Title](#)
- Allen, A.E., Moustafa, A., Montsant, A., Eckert, A., Kroth, P.G., Bowler, C., 2012. Evolution and Functional Diversification of Fructose Bisphosphate Aldolase Genes in Photosynthetic Marine Diatoms. *Mol Biol Evol* 29, 367–379. <https://doi.org/10.1093/molbev/msr223>  
PubMed: [Author and Title](#)  
Google Scholar: [Author Only Title Only Author and Title](#)
- Allen, J.F., 2002. Photosynthesis of ATP-Electrons, Proton Pumps, Rotors, and Poise. *Cell* 110, 273–276. [https://doi.org/10.1016/S0092-8674\(02\)00870-X](https://doi.org/10.1016/S0092-8674(02)00870-X)  
PubMed: [Author and Title](#)  
Google Scholar: [Author Only Title Only Author and Title](#)
- Annett, A.L., Lapi, S., Ruth, T.J., Maldonado, M.T., 2008. The effects of Cu and Fe availability on the growth and Cu:C ratios of marine diatoms. *Limnol. Oceanogr.* 53, 2451–2461. <https://doi.org/10.4319/lo.2008.53.6.2451>  
PubMed: [Author and Title](#)  
Google Scholar: [Author Only Title Only Author and Title](#)
- Armbrust, E.V., 2009. The life of diatoms in the world's oceans. *Nature* 459, 185–192. <https://doi.org/10.1038/nature08057>  
PubMed: [Author and Title](#)  
Google Scholar: [Author Only Title Only Author and Title](#)
- Armbrust, E.V., Berges, J.A., Bowler, C., Green, B.R., Martinez, D., Putnam, N.H., Zhou, S., Allen, A.E., Apt, K.E., Bechner, M., Brzezinski, M.A., Chaal, B.K., Chiovitti, A., Davis, A.K., Demarest, M.S., Detter, J.C., Glavina, T., Goodstein, D., Hadi, M.Z., Hellsten, U., Hildebrand, M., Jenkins, B.D., Jurka, J., Kapitonov, V.V., Kröger, N., Lau, W.W.Y., Lane, T.W., Larimer, F.W., Lippmeier, J.C., Lucas, S., Medina, M., Montsant, A., Obornik, M., Parker, M.S., Palenik, B., Pazour, G.J., Richardson, P.M., Rynearson, T.A., Saito, M.A., Schwartz, D.C., Thamatrakoln, K., Valentin, K., Vardi, A., Wilkerson, F.P., Rokhsar, D.S., 2004. The Genome of the Diatom *Thalassiosira pseudonana*: Ecology, Evolution, and Metabolism. *Science* 306, 79–86. <https://doi.org/10.1126/science.1101156>  
PubMed: [Author and Title](#)  
Google Scholar: [Author Only Title Only Author and Title](#)
- Bailleul, B., Berne, N., Murik, O., Petroutsos, D., Prihoda, J., Tanaka, A., Villanova, V., Bligny, R., Flori, S., Falconet, D., Krieger-Liszka, A., Santabarbara, S., Rappaport, F., Joliot, P., Tirichine, L., Falkowski, P.G., Cardol, P., Bowler, C., Finazzi, G., 2015. Energetic coupling between plastids and mitochondria drives CO<sub>2</sub> assimilation in diatoms. *Nature* 524, 366–369. <https://doi.org/10.1038/nature14599>  
PubMed: [Author and Title](#)  
Google Scholar: [Author Only Title Only Author and Title](#)
- Balmer, Y., Koller, A., Val, G. del, Manieri, W., Schürmann, P., Buchanan, B.B., 2003. Proteomics gives insight into the regulatory function of chloroplast thioredoxins. *PNAS* 100, 370–375. <https://doi.org/10.1073/pnas.232703799>  
PubMed: [Author and Title](#)  
Google Scholar: [Author Only Title Only Author and Title](#)
- Bowler, C., Allen, A.E., Badger, J.H., Grimwood, J., Jabbari, K., Kuo, A., Maheswari, U., Martens, C., Maumus, F., Otiillar, R.P., Rayko, E., Salamov, A., Vandepoele, K., Beszteri, B., Gruber, A., Heijde, M., Katinka, M., Mock, T., Valentin, K., Verret, F., Berges, J.A., Brownlee, C., Cadoret, J.-P., Chiovitti, A., Choi, C.J., Coesel, S., De Martino, A., Detter, J.C., Durkin, C., Falciatore, A., Fournet, J., Haruta, M., Huysman, M.J.J., Jenkins, B.D., Jiroutova, K., Jorgensen, R.E., Joubert, Y., Kaplan, A., Kröger, N., Kroth, P.G., La Roche, J., Lindquist, E., Lommer, M., Martin-Jézéquel, V., Lopez, P.J., Lucas, S., Mangogna, M., McGinnis, K., Medlin, L.K., Montsant, A., Secq, M.-P.O., Napoli, C., Obornik, M., Parker, M.S., Petit, J.-L., Porcel, B.M., Poulsen, N., Robison, M., Rychlewski, L., Rynearson, T.A., Schmutz, J., Shapiro, H., Siaut, M., Stanley, M., Sussman, M.R., Taylor, A.R., Vardi, A., von Dassow, P., Vyverman, W., Willis, A., Wyrwicz, L.S., Rokhsar, D.S., Weissenbach, J., Armbrust, E.V., Green, B.R., Van de Peer, Y., Grigoriev, I.V., 2008. The *Phaeodactylum* genome reveals the evolutionary history of diatom genomes. *Nature* 456, 239–244. <https://doi.org/10.1038/nature07410>  
PubMed: [Author and Title](#)  
Google Scholar: [Author Only Title Only Author and Title](#)
- Broddrick, J.T., Du, N., Smith, S.R., Tsuji, Y., Jallet, D., Ware, M.A., Peers, G., Matsuda, Y., Dupont, C.L., Mitchell, B.G., Palsson, B.O., Allen, A.E., 2019. Cross-compartment metabolic coupling enables flexible photoprotective mechanisms in the diatom *Phaeodactylum tricornutum*. *New Phytologist* 222, 1364–1379. <https://doi.org/10.1111/nph.15685>  
PubMed: [Author and Title](#)  
Google Scholar: [Author Only Title Only Author and Title](#)
- Emanuelsson, O., Brunak, S., von Heijne, G., Nielsen, H., 2007. Locating proteins in the cell using TargetP, SignalP and related tools. *Nat. Protocols* 2, 953–971. <https://doi.org/10.1038/nprot.2007.131>

Pubmed: [Author and Title](#)

Google Scholar: [Author Only Title Only Author and Title](#)

Ewe, D., Tachibana, M., Kikutani, S., Gruber, A., Rio Bártulos, C., Konert, G., Kaplan, A., Matsuda, Y., Kroth, P.G., 2018. The intracellular distribution of inorganic carbon fixing enzymes does not support the presence of a C4 pathway in the diatom *Phaeodactylum tricorutum*. *Photosynth Res* 137, 263–280. <https://doi.org/10.1007/s11120-018-0500-5>

Pubmed: [Author and Title](#)

Google Scholar: [Author Only Title Only Author and Title](#)

Fabris, M., Matthijs, M., Rombauts, S., Vyverman, W., Goossens, A., Baart, G.J.E., 2012. The metabolic blueprint of *Phaeodactylum tricorutum* reveals a eukaryotic Entner–Doudoroff glycolytic pathway. *The Plant Journal* 70, 1004–1014. <https://doi.org/10.1111/j.1365-313X.2012.04941.x>

Pubmed: [Author and Title](#)

Google Scholar: [Author Only Title Only Author and Title](#)

Field, C.B., Behrenfeld, M.J., Randerson, J.T., Falkowski, P., 1998. Primary Production of the Biosphere: Integrating Terrestrial and Oceanic Components. *Science* 281, 237–240. <https://doi.org/10.1126/science.281.5374.237>

Pubmed: [Author and Title](#)

Google Scholar: [Author Only Title Only Author and Title](#)

Finazzi, G., Moreau, H., Bowler, C., 2010. Genomic insights into photosynthesis in eukaryotic phytoplankton. *Trends in Plant Science* 15, 565–572. <https://doi.org/10.1016/j.tplants.2010.07.004>

Pubmed: [Author and Title](#)

Google Scholar: [Author Only Title Only Author and Title](#)

Flori, S., Jouneau, P.-H., Bailleul, B., Gallet, B., Estrozi, L.F., Moriscot, C., Bastien, O., Eicke, S., Schober, A., Bártulos, C.R., Maréchal, E., Kroth, P.G., Petroustos, D., Zeeman, S., Breyton, C., Schoehn, G., Falconet, D., Finazzi, G., 2017. Plastid thylakoid architecture optimizes photosynthesis in diatoms. *Nat Commun* 8, 1–9. <https://doi.org/10.1038/ncomms15885>

Pubmed: [Author and Title](#)

Google Scholar: [Author Only Title Only Author and Title](#)

Foyer, C.H., Noctor, G., 2011. Ascorbate and Glutathione: The Heart of the Redox Hub. *Plant Physiol.* 155, 2–18. <https://doi.org/10.1104/pp.110.167569>

Pubmed: [Author and Title](#)

Google Scholar: [Author Only Title Only Author and Title](#)

Gallogly, M.M., Mieyal, J.J., 2007. Mechanisms of reversible protein glutathionylation in redox signaling and oxidative stress. *Current Opinion in Pharmacology, Cancer/Immunomodulation* 7, 381–391. <https://doi.org/10.1016/j.coph.2007.06.003>

Pubmed: [Author and Title](#)

Google Scholar: [Author Only Title Only Author and Title](#)

Gruber, A., Kroth, P.G., 2017. Intracellular metabolic pathway distribution in diatoms and tools for genome-enabled experimental diatom research. *Phil. Trans. R. Soc. B* 372, 20160402. <https://doi.org/10.1098/rstb.2016.0402>

Pubmed: [Author and Title](#)

Google Scholar: [Author Only Title Only Author and Title](#)

Gruber, A., Kroth, P.G., 2014. Deducing Intracellular Distributions of Metabolic Pathways from Genomic Data, in: Sriram, G. (Ed.), *Plant Metabolism*. Humana Press, Totowa, NJ, pp. 187–211. [https://doi.org/10.1007/978-1-62703-661-0\\_12](https://doi.org/10.1007/978-1-62703-661-0_12)

Pubmed: [Author and Title](#)

Google Scholar: [Author Only Title Only Author and Title](#)

Gruber, A., Rocap, G., Kroth, P.G., Armbrust, E.V., Mock, T., 2015. Plastid proteome prediction for diatoms and other algae with secondary plastids of the red lineage. *Plant J* 81, 519–528. <https://doi.org/10.1111/tpj.12734>

Pubmed: [Author and Title](#)

Google Scholar: [Author Only Title Only Author and Title](#)

Gruber, A., Weber, T., Bártulos, C.R., Vugrinec, S., Kroth, P.G., 2009. Intracellular distribution of the reductive and oxidative pentose phosphate pathways in two diatoms. *J. Basic Microbiol.* 49, 58–72. <https://doi.org/10.1002/jobm.200800339>

Pubmed: [Author and Title](#)

Google Scholar: [Author Only Title Only Author and Title](#)

Guo, J., Green, B.R., Maldonado, M.T., 2015. Sequence Analysis and Gene Expression of Potential Components of Copper Transport and Homeostasis in *Thalassiosira pseudonana*. *Protist* 166, 58–77. <https://doi.org/10.1016/j.protis.2014.11.006>

Pubmed: [Author and Title](#)

Google Scholar: [Author Only Title Only Author and Title](#)

Guo, J., Lapi, S., Ruth, T.J., Maldonado, M.T., 2012. The Effects of Iron and Copper Availability on the Copper Stoichiometry of Marine Phytoplankton1. *Journal of Phycology* 48, 312–325. <https://doi.org/10.1111/j.1529-8817.2012.01133.x>

Pubmed: [Author and Title](#)

Google Scholar: [Author Only Title Only Author and Title](#)

Heineke, D., Riens, B., Grosse, H., Hoferichter, P., Peter, U., Flügge, U.-I., Heldt, H.W., 1991. Redox Transfer across the Inner Chloroplast Envelope Membrane. *Plant Physiol.* 95, 1131–1137. <https://doi.org/10.1104/pp.95.4.1131>

Pubmed: [Author and Title](#)

Google Scholar: [Author Only Title Only Author and Title](#)

Hippmann, A.A., Schuback, N., Moon, K.-M., McCrow, J.P., Allen, A.E., Foster, L.J., Green, B.R., Maldonado, M.T., 2017. Contrasting effects of copper limitation on the photosynthetic apparatus in two strains of the open ocean diatom *Thalassiosira oceanica*. *PLOS ONE* 12, e0181753. <https://doi.org/10.1371/journal.pone.0181753>

Pubmed: [Author and Title](#)

Google Scholar: [Author Only](#) [Title Only](#) [Author and Title](#)

Hockin, N.L., Mock, T., Mulholland, F., Kopriva, S., Malin, G., 2012. The Response of Diatom Central Carbon Metabolism to Nitrogen Starvation Is Different from That of Green Algae and Higher Plants[W]. *Plant Physiol* 158, 299–312.

<https://doi.org/10.1104/pp.111.184333>

Pubmed: [Author and Title](#)

Google Scholar: [Author Only](#) [Title Only](#) [Author and Title](#)

Hoefnagel, M.H.N., Atkin, O.K., Wiskich, J.T., 1998. Interdependence between chloroplasts and mitochondria in the light and the dark. *Biochimica et Biophysica Acta (BBA) - Bioenergetics* 1366, 235–255. [https://doi.org/10.1016/S0005-2728\(98\)00126-1](https://doi.org/10.1016/S0005-2728(98)00126-1)

Pubmed: [Author and Title](#)

Google Scholar: [Author Only](#) [Title Only](#) [Author and Title](#)

Kim, J., Fabris, M., Baart, G., Kim, M.K., Goossens, A., Vyverman, W., Falkowski, P.G., Lun, D.S., 2016. Flux balance analysis of primary metabolism in the diatom *Phaeodactylum tricornutum*. *Plant J* 85, 161–176. <https://doi.org/10.1111/tpj.13081>

Pubmed: [Author and Title](#)

Google Scholar: [Author Only](#) [Title Only](#) [Author and Title](#)

Kim, J.-W., Price, N.M., 2017. The influence of light on copper-limited growth of an oceanic diatom, *Thalassiosira oceanica* (Coccosinodiscophyceae). *J. Phycol.* n/a-n/a. <https://doi.org/10.1111/jpy.12563>

Pubmed: [Author and Title](#)

Google Scholar: [Author Only](#) [Title Only](#) [Author and Title](#)

Kong, L., M. Price, N., 2020. Identification of copper-regulated proteins in an oceanic diatom, *Thalassiosira oceanica* 1005. *Metallomics* 12, 1106–1117. <https://doi.org/10.1039/D0MT00033G>

Pubmed: [Author and Title](#)

Google Scholar: [Author Only](#) [Title Only](#) [Author and Title](#)

Kroth, P.G., Chiovitti, A., Gruber, A., Martin-Jezequel, V., Mock, T., Parker, M.S., Stanley, M.S., Kaplan, A., Caron, L., Weber, T., Maheswari, U., Armbrust, E.V., Bowler, C., 2008. A Model for Carbohydrate Metabolism in the Diatom *Phaeodactylum tricornutum* Deduced from Comparative Whole Genome Analysis. *PLOS ONE* 3, e1426. <https://doi.org/10.1371/journal.pone.0001426>

Pubmed: [Author and Title](#)

Google Scholar: [Author Only](#) [Title Only](#) [Author and Title](#)

Lelong, A., Bucciarelli, E., Hégaret, H., Soudant, P., 2013. Iron and copper limitations differently affect growth rates and photosynthetic and physiological parameters of the marine diatom *Pseudo-nitzschia delicatissima*. *Limnol. Oceanogr.* 58, 613–623.

<https://doi.org/10.4319/lo.2013.58.2.0613>

Pubmed: [Author and Title](#)

Google Scholar: [Author Only](#) [Title Only](#) [Author and Title](#)

Levering, J., Broddrick, J., Dupont, C.L., Peers, G., Beeri, K., Mayers, J., Gallina, A.A., Allen, A.E., Palsson, B.O., Zengler, K., 2016. Genome-Scale Model Reveals Metabolic Basis of Biomass Partitioning in a Model Diatom. *PLOS ONE* 11, e0155038.

<https://doi.org/10.1371/journal.pone.0155038>

Pubmed: [Author and Title](#)

Google Scholar: [Author Only](#) [Title Only](#) [Author and Title](#)

Lombardi, A.T., Maldonado, M.T., 2011. The effects of copper on the photosynthetic response of *Phaeocystis cordata*. *Photosynth Res* 108, 77–87. <https://doi.org/10.1007/s11120-011-9655-z>

Pubmed: [Author and Title](#)

Google Scholar: [Author Only](#) [Title Only](#) [Author and Title](#)

Lommer, M., Roy, A.-S., Schilabel, M., Schreiber, S., Rosenstiel, P., LaRoche, J., 2010. Recent transfer of an iron-regulated gene from the plastid to the nuclear genome in an oceanic diatom adapted to chronic iron limitation. *BMC Genomics* 11, 718.

<https://doi.org/10.1186/1471-2164-11-718>

Pubmed: [Author and Title](#)

Google Scholar: [Author Only](#) [Title Only](#) [Author and Title](#)

Maldonado, M.T., Allen, A.E., Chong, J.S., Lin, K., Leus, D., Karpenko, N., Harris, S.L., 2006. Copper-dependent iron transport in coastal and oceanic diatoms. *Limnol. Oceanogr.* 51, 1729–1743. <https://doi.org/10.4319/lo.2006.51.4.1729>

Pubmed: [Author and Title](#)

Google Scholar: [Author Only](#) [Title Only](#) [Author and Title](#)

Maldonado, M.T., Hughes, M.P., Rue, E.L., Wells, M.L., 2002. The effect of Fe and Cu on growth and domoic acid production by *Pseudo-nitzschia multiseriata* and *Pseudo-nitzschia australis*. *Limnol. Oceanogr.* 47, 515–526. <https://doi.org/10.4319/lo.2002.47.2.0515>

Pubmed: [Author and Title](#)

Google Scholar: [Author Only](#) [Title Only](#) [Author and Title](#)

Moore, J.K., Doney, S.C., Lindsay, K., 2004. Upper ocean ecosystem dynamics and iron cycling in a global three-dimensional model. *Global Biogeochem. Cycles* 18, GB4028. <https://doi.org/10.1029/2004GB002220>

Pubmed: [Author and Title](#)

Google Scholar: [Author Only Title Only Author and Title](#)

**Moustafa, A., Beszteri, B., Maier, U.G., Bowler, C., Valentin, K., Bhattacharya, D., 2009. Genomic Footprints of a Cryptic Plastid Endosymbiosis in Diatoms. *Science* 324, 1724–1726. <https://doi.org/10.1126/science.1172983>**

Pubmed: [Author and Title](#)

Google Scholar: [Author Only Title Only Author and Title](#)

**Mueller-Cajar, O., Stotz, M., Wendler, P., Hartl, F.U., Bracher, A., Hayer-Hartl, M., 2011. Structure and function of the AAA+ protein CbbX, a red-type Rubisco activase. *Nature* 479, 194–199. <https://doi.org/10.1038/nature10568>**

Pubmed: [Author and Title](#)

Google Scholar: [Author Only Title Only Author and Title](#)

**Nelson, D.M., Tréguer, P., Brzezinski, M.A., Leynaert, A., Quéguiner, B., 1995. Production and dissolution of biogenic silica in the ocean: Revised global estimates, comparison with regional data and relationship to biogenic sedimentation. *Global Biogeochem. Cycles* 9, 359–372. <https://doi.org/10.1029/95GB01070>**

Pubmed: [Author and Title](#)

Google Scholar: [Author Only Title Only Author and Title](#)

**Niyogi, K.K., 2000. Safety valves for photosynthesis. *Current Opinion in Plant Biology* 3, 455–460. [https://doi.org/10.1016/S1369-5266\(00\)00113-8](https://doi.org/10.1016/S1369-5266(00)00113-8)**

Pubmed: [Author and Title](#)

Google Scholar: [Author Only Title Only Author and Title](#)

**Obornik, M., Green, B.R., 2005. Mosaic Origin of the Heme Biosynthesis Pathway in Photosynthetic Eukaryotes. *Mol Biol Evol* 22, 2343–2353. <https://doi.org/10.1093/molbev/msi230>**

Pubmed: [Author and Title](#)

Google Scholar: [Author Only Title Only Author and Title](#)

**Oudot-Le Secq, M.-P.O.-L., Grimwood, J., Shapiro, H., Armbrust, E.V., Bowler, C., Green, B.R., 2007. Chloroplast genomes of the diatoms *Phaeodactylum tricornutum* and *Thalassiosira pseudonana*: comparison with other plastid genomes of the red lineage. *Mol Genet Genomics* 277, 427–439. <https://doi.org/10.1007/s00438-006-0199-4>**

Pubmed: [Author and Title](#)

Google Scholar: [Author Only Title Only Author and Title](#)

**Peers, G., Price, N.M., 2006. Copper-containing plastocyanin used for electron transport by an oceanic diatom. *Nature* 441, 341–344. <https://doi.org/10.1038/nature04630>**

Pubmed: [Author and Title](#)

Google Scholar: [Author Only Title Only Author and Title](#)

**Peers, G., Quesnel, S.-A., Price, N.M., 2005. Copper requirements for iron acquisition and growth of coastal and oceanic diatoms. *Limnol. Oceanogr.* 50, 1149–1158. <https://doi.org/10.4319/lo.2005.50.4.1149>**

Pubmed: [Author and Title](#)

Google Scholar: [Author Only Title Only Author and Title](#)

**Petersen, T.N., Brunak, S., von Heijne, G., Nielsen, H., 2011. SignalP 4.0: discriminating signal peptides from transmembrane regions. *Nat Meth* 8, 785–786. <https://doi.org/10.1038/nmeth.1701>**

Pubmed: [Author and Title](#)

Google Scholar: [Author Only Title Only Author and Title](#)

**Prihoda, J., Tanaka, A., Paula, W.B.M. de, Allen, J.F., Tirichine, L., Bowler, C., 2012. Chloroplast-mitochondria cross-talk in diatoms. *J. Exp. Bot.* 63, 1543–1557. <https://doi.org/10.1093/jxb/err441>**

Pubmed: [Author and Title](#)

Google Scholar: [Author Only Title Only Author and Title](#)

**Río Bártulos, C., Rogers, M.B., Williams, T.A., Gentekaki, E., Brinkmann, H., Cerff, R., Liaud, M.-F., Hehl, A.B., Yarlett, N.R., Gruber, A., Kroth, P.G., van der Giezen, M., 2018. Mitochondrial Glycolysis in a Major Lineage of Eukaryotes. *Genome Biol Evol* 10, 2310–2325. <https://doi.org/10.1093/gbe/evy164>**

Pubmed: [Author and Title](#)

Google Scholar: [Author Only Title Only Author and Title](#)

**Scheibe, R., 2004. Malate valves to balance cellular energy supply. *Physiologia Plantarum* 120, 21–26. <https://doi.org/10.1111/j.0031-9317.2004.0222.x>**

Pubmed: [Author and Title](#)

Google Scholar: [Author Only Title Only Author and Title](#)

**Schober, A.F., Río Bártulos, C., Bischoff, A., Lepetit, B., Gruber, A., Kroth, P.G., 2019. Organelle Studies and Proteome Analyses of Mitochondria and Plastids Fractions from the Diatom *Thalassiosira pseudonana*. *Plant Cell Physiol* 60, 1811–1828. <https://doi.org/10.1093/pcp/pcz097>**

Pubmed: [Author and Title](#)

Google Scholar: [Author Only Title Only Author and Title](#)

**Smith, S.R., Abbriano, R.M., Hildebrand, M., 2012. Comparative analysis of diatom genomes reveals substantial differences in the organization of carbon partitioning pathways. *Algal Research* 1, 2–16. <https://doi.org/10.1016/j.algal.2012.04.003>**

Pubmed: [Author and Title](#)

Google Scholar: [Author Only](#) [Title Only](#) [Author and Title](#)

**Vizcaíno, J.A., Csordas, A., del-Toro, N., Dianas, J.A., Griss, J., Lavidas, I., Mayer, G., Perez-Riverol, Y., Reisinger, F., Ternent, T., Xu, Q.-W., Wang, R., Hermjakob, H., 2016. 2016 update of the PRIDE database and its related tools. *Nucleic Acids Res.* **44**, D447-456.**

<https://doi.org/10.1093/nar/gkv1145>

Pubmed: [Author and Title](#)

Google Scholar: [Author Only](#) [Title Only](#) [Author and Title](#)

**Weber, T., Gruber, A., Kroth, P.G., 2009. The Presence and Localization of Thioredoxins in Diatoms, Unicellular Algae of Secondary Endosymbiotic Origin. *Molecular Plant* **2**, 468–477. <https://doi.org/10.1093/mp/ssp010>**

Pubmed: [Author and Title](#)

Google Scholar: [Author Only](#) [Title Only](#) [Author and Title](#)

**Zechmann, B., 2014. Compartment-specific importance of glutathione during abiotic and biotic stress. *Front Plant Sci* **5**. <https://doi.org/10.3389/fpls.2014.00566>**

Pubmed: [Author and Title](#)

Google Scholar: [Author Only](#) [Title Only](#) [Author and Title](#)
